# Supplementary material for: Effect of a Peer-Led Behavioral Intervention for Emergency Department Patients at High Risk of Fatal Opioid Overdose: A Randomized Clinical Trial
Source: PubMed Central journal article supplement (PMC9364125; doi:10.1001/jamanetworkopen.2022.25582), 2022-08-09
Supplement: jamanetwopen-e2225582-s001.pdf [file jamanetwopen-e2225582-s001.pdf]

## 1 **SPECIFIC AIMS**

2 Opioid overdoses are a leading cause of death for Americans under 50 years old, with  
3 recent years recording the most opioid overdose deaths on record.<sup>1,2</sup> US Emergency  
4 Departments (EDs) have seen a parallel increase in opioid-related visits (a 100% increase from  
5 2005 – 2014).<sup>3</sup> ED patients presenting for an overdose are at greatly elevated risk for a repeat  
6 overdose and death.<sup>4,6</sup> **Thus, an overdose-related ED visit is both a critical and opportune  
7 time to prevent recurrent opioid overdose and overdose death through increased uptake  
8 in addiction treatment.**<sup>7</sup> The most effective means to promote engagement in treatment  
9 following an ED visit for opioid overdose remains unknown. To address this critical evidence  
10 gap, we will compare the effectiveness of two ED-based behavioral interventions to increase  
11 treatment uptake and reduce the risk of future overdose among ED patients who are at greatest  
12 risk of accidental drug-related death.

13 Rhode Island (RI) has the fifth highest rate of overdose mortality in the nation.<sup>2</sup> In response  
14 to RI's overdose crisis, in 2014, the state's largest ED (Rhode Island Hospital) began a  
15 proactive campaign to improve the care of overdose patients. The program includes an ED-  
16 based behavioral intervention either by in-house clinical social work staff or peer recovery  
17 support specialists ("peer navigators").<sup>8</sup> Following the introduction of these interventions in the  
18 ED, there was 10-fold increase in the proportion of patients engaging in addiction treatment  
19 within 30 days of the initial ED visit. While this preliminary data is promising, the effectiveness of  
20 the peer navigators versus the social work intervention is not known. Both interventions are  
21 intended to promote early treatment engagement after the ED visit, but peer navigators are  
22 distinguished from hospital-based staff in that they: (1) help navigate personal and structural  
23 barriers to treatment utilizing both training and real-life experience (e.g., overcoming stigma,  
24 transportation barriers, relapse triggers); (2) continue to engage patients beyond their ED visit  
25 (when they are especially vulnerable to recurrent overdose and death); and (3), promote long-  
26 term retention in treatment programs, including medication assisted treatment (MAT), through a  
27 long-term relationship that was established at the ED visit. Although peer support is a  
28 recognized component of many successful addiction treatment and recovery approaches,<sup>9-15</sup> the  
29 use of peer navigators in the ED setting to care for overdose patients is highly novel.

30 **The Rhode Island peer navigator intervention model is being expanded nationwide,  
31 yet the effectiveness of this approach, relative to standard interventions delivered by  
32 hospital staff, is unknown.** The ED-based peer navigator program was developed in  
33 alignment with the federally funded Rhode Island State Targeted Response initiative and is a  
34 key component of Rhode Island's strategic action plan to address opioid addiction and  
35 overdose.<sup>16</sup> Of critical significance to this proposal, there is substantial interest from other states  
36 in replicating RI's peer navigation model.<sup>17</sup> In light of this growing national attention, a recently  
37 published J-PAL policy brief made a call for formal evaluations of ED-based peer  
38 interventions.<sup>18</sup>

39 To address this urgent need, we will conduct the Navigator Trial, a randomized controlled  
40 trial (RCT) of early ED behavioral interventions following an opioid overdose. **We hypothesize  
41 that peer navigation will result in greater early treatment engagement and reduction in  
42 recurrent opioid overdose compared to a standard intervention delivered by a clinical  
43 social worker.** A key strength of this study is the ability to link patient data with statewide  
44 administrative databases to ascertain objective outcome data on all study participants. These  
45 databases are part of the state's robust CDC-funded overdose surveillance platform,  
46 [www.PreventOverdoseRI.org](http://www.PreventOverdoseRI.org), and include information on all overdose events, as well as  
47 admissions and discharges to all licensed substance abuse treatment facilities in Rhode Island.

48 **Primary Aim 1a.** We will determine the effectiveness of peer navigation versus a standard  
49 behavioral intervention delivered in the ED to overdose patients and those at risk of recurrent  
50 opioid overdose. 650 patients will be recruited between Rhode Island Hospital (RIH) and The

51 Miriam Hospital (TMH) ED (n=325 per arm) and followed for 18 months. Effectiveness will be  
52 measured objectively through linkage to administrative statewide databases, with two primary  
53 endpoints: (1) engagement in formal addiction treatment (e.g., inpatient services, outpatient  
54 services, MAT) from a licensed substance abuse treatment provider within 30 days following the  
55 ED visit, and (2) reduction in 18-month recurrent ED visits for an opioid overdose. Exploratory  
56 outcomes of interest are: overdose fatality, repeat ED visits related to opioids, and successful  
57 completion of an addiction treatment program and/or long-term retention in MAT.

58 **Primary Aim 1b.** We will assess the impact of two interventions from the RCT (peer navigation  
59 OR social worker intervention n=650) against a “no treatment” control group (n=325) on the  
60 outcomes in 1a. Opioid overdose patients who decline treatment as part of the RCT  
61 interventions, yet consent to follow-up, ongoing record review, and administrative database  
62 linkage will be utilized as controls.

63

64 A total of 975 (325 receiving Peer Navigator services, 325 receiving Social Work services, and  
65 325 who declined receiving either of these services) subjects will be enrolled in this study.

66

67 **Secondary Aim.** We will explore if there is heterogeneity of treatment effect related to patient  
68 characteristics. We anticipate that there will be individuals within each treatment arm who will  
69 vary in their response to the intervention. Specifically, we will examine if the effects of the  
70 interventions are modified by baseline characteristics such as age, sex, race, type of opioid  
71 used, and history of comorbid chronic pain, depression or PTSD. Understanding these factors  
72 will allow us to further optimize subsequent interventions.

73 In sum, this study will evaluate a government-funded program that is being successfully  
74 delivered under real-world conditions, but that has not been rigorously tested. This trial will  
75 provide critical data regarding the effectiveness of ED-based peer navigation services, with  
76 major implications for Rhode Island and other states.

77

78 **Qualitative Aim.** From the participants recruited, a subset of 30 patients will be interviewed 2-  
79 10 days following their enrollment to better understand the reasons why they may have refused  
80 or accepted Social Work or Peer Navigator services, their experiences with these services, and  
81 provide a foundation for improving such services.

82

## 83 **RESEARCH STRATEGY**

### 84 **A. Significance**

85 **A.1. Opioid overdose prevention is urgently needed.** In 2015, over 33,000 people died from  
86 opioid-related drug overdoses in the United States, more than any previous year on record.<sup>1,2,19</sup>  
87 The opioid epidemic has not abated despite a recent overall decrease in the number of opioid  
88 analgesics prescribed by US providers.<sup>2,20-23</sup> While opioid analgesic prescribing is believed to  
89 have initially driven this opioid crisis,<sup>24</sup> the epidemic has rapidly evolved. Heroin use is  
90 increasing for the first time in more than a decade,<sup>19,25-30</sup> and overdose deaths due to potent  
91 synthetic opioids, such as fentanyl and carfentanil, are on the rise.<sup>31-37</sup> In light of this public  
92 health crisis, there is a pressing need for novel approaches to reduce overdose deaths and  
93 mitigate other opioid-related harms. **In response to this epidemic, the primary goal of our**  
94 **study is to intervene on a subset of persons who are among those at highest risk for**  
95 **drug-related mortality — patients presenting to an emergency department (ED) for an**  
96 **opioid overdose** and those at risk of recurrent opioid overdose.

97 **A.2. The Emergency Department (ED) as a critical intervention site.** Between 2005 and  
98 2014, the national rate of opioid-related ED visits increased almost 100%.<sup>38,39</sup> Alarmingly, ED

99 visits for drug overdoses continue to rise.<sup>3</sup> Rhode Island ranks as the second highest in the  
 100 nation for the rate of opioid-related ED visits.<sup>38</sup> Over the last 18-month period, over 2,200 opioid  
 101 overdose patients have been treated in EDs across the state. In the year after presenting to the  
 102 ED for an overdose, a person is a heightened risk for all-cause mortality (7-fold increase).<sup>5</sup> **The**  
 103 **ED may be the only contact point with the health care system and is thus both a critical**  
 104 **and timely place for intervention**, using the reason for the ED visit itself (i.e., overdose) as an  
 105 opportunity to identify patients at highest risk of drug-related mortality and deliver behavioral  
 106 interventions.<sup>40-44</sup>

107 **A.3. Peer-based interventions are a proactive approach.** The majority of overdose patients  
 108 in the state present to the Rhode Island Hospital ED, one of the study sites for this investigation.  
 109 Of those presenting to the RIH ED, nearly half receive some sort of behavioral intervention in  
 110 the ED, approximately 40% of whom currently receive counseling from a peer navigator, see

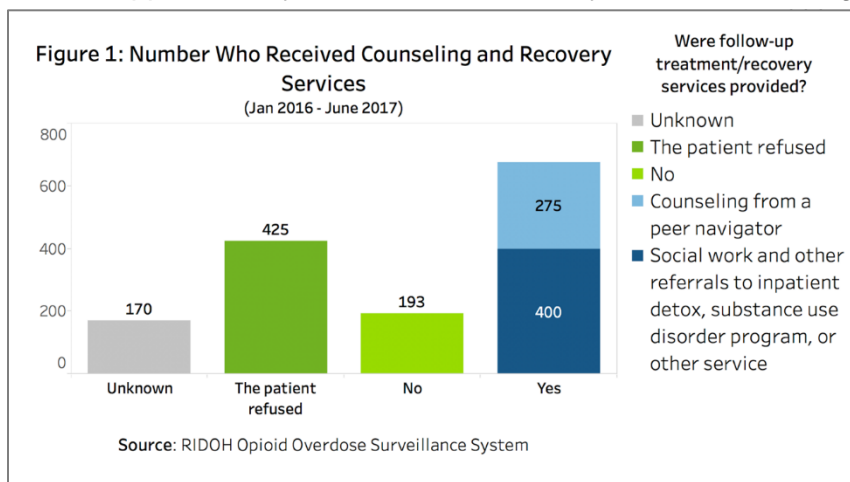

**Figure 1.** Peer navigators are individuals in long-term addiction recovery uniquely positioned to form supportive relationships with those struggling with addiction, helping patients “navigate” obstacles to recovery through problem solving, goal setting, avoiding relapse triggers, and planning or obtaining services. Continued contact with the patient after the ED visit is a critical component of the

126 peer-based model. Finally, peer navigation programs are distinct from other behavioral  
 127 interventions in that they are centered on the recovery process, cultural diversity and inclusion,  
 128 community participation, peers helping peers, and leadership development.<sup>45</sup> **Despite the**  
 129 **promising approach, no studies have rigorously evaluated whether peer-based**  
 130 **behavioral interventions result in improved outcomes for patients treated for an opioid**  
 131 **overdose.**<sup>18</sup>

132 Peer-based interventions have been shown to be an effective component of care across  
 133 non-clinical settings,<sup>46</sup> and in other aspects of health care for other conditions.<sup>47-50</sup> There are  
 134 also early examples of peer-directed interventions in the ED for other conditions, but not opioid  
 135 overdose.<sup>51,52</sup> **This trial is the first to test whether a peer-based model is more effective**  
 136 **than a brief intervention delivered by clinical social workers for patients at risk of**  
 137 **subsequent overdose.**

138 **A.4 Rapid dissemination of study findings and integration with key public health**  
 139 **stakeholders.** Several factors ensure that the results of this study will inform future care for  
 140 overdose patients in Rhode Island and beyond. First, strong collaborations with state agencies  
 141 will support expansion of peer-based interventions if they are found to be effective. As  
 142 demonstrated by our letters of support, our team has fostered a strong and established network  
 143 of organizations, public health experts, and political leaders working collectively to reduce opioid  
 144 overdose deaths across Rhode Island. **This strong foundation will allow dissemination of**  
 145 **project results to key stakeholders, ensuring that knowledge gained from this study**  
 146 **positively impacts care for overdose patients in the state.** Second, the Rhode Island  
 147 Department of Behavioral Healthcare, Developmental Disabilities, and Hospitals (BHDDH),  
 148 which funds the peer recovery program through a SAMSHA initiative, has plans to increase the

149 number of certified peer navigators by 50% starting in 2018. The Director of BHDDH, Rebecca  
150 Boss, has affirmed that “if the proposed trial demonstrates peer-based ED navigation to be  
151 superior to current standards of care for patients admitted to the ED for an overdose, we would  
152 continue to expand this program throughout hospitals across Rhode Island” (see letter of  
153 support). Finally, we will work with the Laura and John Arnold Foundation and other partners to  
154 broadly disseminate our finding to other states, many of which have already adapted the Rhode  
155 Island peer recovery model.<sup>53</sup>

## 156 157 **B. Innovation**

158 **B.1 Rhode Island is a national leader in developing highly innovative programs for**  
159 **overdose prevention.** The state has established national models for overdose prevention and  
160 intervention, and has encouraged community-level innovation. In response to the growing  
161 overdose crisis and with funding from BHDDH, in 2014, the community-based organization  
162 Anchor Recovery Community Center launched a new initiative, AnchorED. Anchor Recovery  
163 Community Center (ARCC) is Rhode Island’s first and only community organization run by and  
164 dedicated to those living in recovery from substance use disorders. Focusing on a peer-to-peer  
165 support model, ARCC helps those living with substance use disorders maintain long-term  
166 recovery, improve social connectedness, improve self-sufficiency, and live healthier lives. The  
167 AnchorED program takes the peer model into the ED, dispatching trained and certified peer  
168 navigators to EDs throughout RI to provide recovery support and services navigation to  
169 individuals who have experienced an opioid overdose (see additional details in section C.3).  
170 **Importantly, AnchorED is the first program of its kind in the nation.**<sup>54</sup> Despite a paucity of  
171 evidence to demonstrate effectiveness and improved long-term outcomes for overdose  
172 survivors, jurisdictions in New York, Connecticut, Massachusetts, New Hampshire, and New  
173 Jersey are in the process of creating programs based on the Rhode Island peer model.<sup>55</sup> **Given**  
174 **the intense interest in peer recovery models in settings across the nation, the results of**  
175 **our study have a strong potential to fundamentally shift clinical practice paradigms for**  
176 **treating overdose patients in the ED.**

177 **B.2 A data-rich policy and public health environment to boost study rigor.** In 2015,  
178 Governor Gina Raimondo signed an executive order to establish the Rhode Island Overdose  
179 Prevention and Intervention Task Force. This task force charged experts (including Dr. Marshall,  
180 Co-PI) to develop a strategic plan that would guide efforts to tackle the state’s overdose crisis.<sup>56</sup>  
181 An important outcome of this plan was a comprehensive data-sharing framework between key  
182 state agencies and academic researchers.<sup>57</sup> This data sharing agreement offers unprecedented  
183 access to population-based overdose morbidity and mortality data. As a result, our team has the  
184 capacity to link Navigator Trial patient data with multiple statewide administrative databases  
185 (e.g., medical examiner case files, behavioral health data on treatment admissions) to ascertain  
186 objective outcome data. Importantly, by linking patient data to these datasets, we will be able to  
187 assess objective primary and exploratory outcomes (e.g., engagement in treatment, overdose  
188 death) for all study participants. **The ability to conduct robust data linkages is an important**  
189 **methodological innovation of our proposed project,** and one that overcomes the limitations  
190 frequently present in other observational and experimental studies of overdose patients (e.g.,  
191 biases related to self-reported outcomes and loss to follow-up). Finally, management of these  
192 datasets and support for the state’s electronic overdose surveillance system  
193 (<http://www.PreventOverdoseRI.org>) are funded by the CDC; thus, the proposed project  
194 leverages existing infrastructure and administrative data to reduce overall study costs.

## 195 196 **C. Approach**

197 **C.1. Study overview, setting, and target population.** We will compare the effectiveness of  
198 peer navigation versus a standard social work intervention delivered in the RIH and TMH EDs  
199 following an ED visit for opioid overdose. 650 patients treated for an opioid overdose or at risk

200 for an opioid overdose (defined below) will be randomized to receive either Social Work or Peer  
201 Navigator services (n=325 per arm) and followed using administrative datasets. Our primary  
202 outcomes will be: (1) engagement in treatment within 30-days after the ED visit, and (2)  
203 recurrent ED visit(s) for opioid overdose over the 18-month follow-up period. Additionally, we will  
204 also enroll a “no intervention” self-selected control group (n=325) at both hospitals to assess the  
205 impact of the two interventions from the RCT (peer navigation OR social worker intervention)  
206 against no intervention. A total of 975 (325 receiving Peer Navigator services, 325 receiving  
207 Social Work services, and 325 who declined receiving either of these services) subjects will be  
208 enrolled in this study. We decided to allow patients to self-select into the “no intervention”  
209 control group. Given that an offer of one of the two behavioral interventions has become the  
210 standard of care for overdose visits in our ED, we believe that it would be unethical to randomly  
211 assign individuals to a “no intervention” control condition. We considered using another RI-  
212 based ED as the control condition, but other EDs across RI have already adopted our program  
213 of offering behavioral intervention following overdose. We will use quasi-experimental statistical  
214 analyses to control for selection bias and confounding that could arise from non-random  
215 assignment of the controls. The two sites where this investigation will take place are Rhode  
216 Island Hospital and The Miriam Hospital ED in Providence (RIH being Dr. Beaudoin’s primary  
217 practice site). RIH is an academic, tertiary care, level one trauma center with >105,000 annual  
218 ED visits, that serves a heterogeneous and demographically diverse patient population. The  
219 RIH ED cares for the majority of opioid overdoses throughout Rhode Island. In 2017, RIH has  
220 recorded an average of 85 opioid overdoses per month (~1,000/year). As such, RIH is an ideal  
221 site for the proposed study.

222 We will recruit adult ED patients in both hospitals who are: (1) being treated for an opioid  
223 overdose, or (2) have had an opioid overdose in the past 12-months (identified by self-report  
224 during screening or in review of the EMR); or (3) are presenting with a visit related to illicit  
225 injection opioid use (e.g., cutaneous injection-related infection, opioid withdrawal, endocarditis).  
226 We are specifically targeting patients with a current or recent opioid overdose and those who  
227 inject opioids illicitly, as they are at highest risk for opioid overdose and death.<sup>4,58</sup>

228 **C.2. A highly experienced research team will ensure this project’s success.** This proposal  
229 leverages thousands of hours of work by the investigative team in conducting clinical trials and  
230 observational studies (see biosketches). For example, co-PI Dr. Beaudoin has an outstanding  
231 track record of leading studies that recruit patients in a busy ED environment, overseeing  
232 screening evaluations and assessments for thousands of patients, and successfully conducting  
233 follow-up in a challenging population of patients with addiction. Dr. Marshall is a nationally  
234 recognized expert in substance use epidemiology and, as the director of the state’s overdose  
235 surveillance system, [www.PreventOverdoseRI.org](http://www.PreventOverdoseRI.org), brings a wealth of experience in the  
236 management and analysis of overdose-related patient data. In sum, Drs. Marshall and Beaudoin  
237 have the complementary expertise necessary to achieve the aims of this project and are  
238 surrounded by a team of multi-disciplinary co-investigators and consultants with expertise in  
239 addiction, behavioral psychology, and peer navigation

240 **C.3. Overview of behavioral interventions available at the Rhode Island Hospital and The**  
241 **Miriam Hospital ED.** Currently, standard of care is to receive a behavioral intervention, *either*  
242 peer navigation or social work. Whether a patient sees a social worker or peer navigator varies  
243 and can depend on the time of day, availability, and preferences or biases of the provider or  
244 patient. Once funded, we have permission and explicit support from the peer and social work  
245 programs to randomize patients to one of the two interventions (see letters of support).

246 Peer Navigators: The Peer Navigators of the Anchor Recovery Community Center (ARCC) of  
247 Rhode Island will deliver the peer navigation arm of the intervention. They are available 24  
248 hours a day, 7 days a week to provide recovery support, referrals, and ongoing engagement for



249 ED patients after discharge. They arrive in the ED within 30 minutes of consultation, assess  
250 individuals for readiness to seek treatment, provide linkage to treatment, and educate on  
251 overdose prevention and response, including naloxone administration. Following the ED visit,  
252 peer navigators follow up with patients within 24-48 hours and maintain contact and services  
253 navigation for at least 90 days following ED discharge, on a weekly basis and more frequently  
254 as needed.

255 To become a peer navigator, applicants must be in long-term recovery ( $\geq 2$  years) and  
256 undergo a rigorous training program. The peer navigators learn motivational interviewing  
257 techniques and the transtheoretical model of behavior, also known as the “stages of change”.<sup>59</sup>  
258 Motivational interviewing is considered to be a patient-centered, non-judgmental approach that  
259 aims to enhance the intervention recipient’s intrinsic motivation to change and building on their  
260 self-identified goals and strengths.<sup>60-62</sup> The “stages of change” framework is widely applied to  
261 substance use disorders, and proposes that individuals move through discrete steps when  
262 making behavior change: Pre-contemplation, Contemplation, Preparation, Action, and  
263 Maintenance.<sup>59,63</sup> In addition to this standard framework, peer navigators support individuals’  
264 self efficacy and prevent relapse by addressing social, environmental, and personal factors,  
265 such as awareness and avoidance of relapse triggers, poly-substance use, stigma of  
266 addiction/treatment, knowledge of treatment services, and financial or transportation barriers to  
267 treatment. **They are uniquely poised to deliver this portion of the intervention by coupling  
268 training with real-life experience in way that cannot be mirrored by hospital-based staff.**

269 Licensed Clinical Social Workers: The staff social workers of the Department of Social Work at  
270 RIH and TMH will deliver the social work arm of the intervention. There are 35 full and part-time  
271 masters-level social workers, all licensed by the state at Rhode Island Hospital and 3 full-time  
272 masters-level social workers at The Miriam Hospital . A social worker is available 24 hours a  
273 day, 7 days a week to see consultations in the RIH ED while at The Miriam Hospital, they are  
274 available from 7 AM-11 PM, 7 days a week. They generally respond to consultations within 30  
275 minutes. They are currently trained and available to deliver interventions to ED patients with  
276 OUD. Clinical social workers are capable of delivering a variety of interviewing and intervention  
277 techniques that are rooted in models of social work theory and practice models.<sup>64-68</sup> Social work  
278 practice models are strategies that the social worker can incorporate into their interventions in  
279 order to help people meet their goals (e.g., task-centered practice,<sup>69</sup> cognitive behavioral  
280 therapy,<sup>70</sup> the crisis intervention model<sup>71</sup>). For the purposes of the study, social workers will also  
281 receive a refresher course in motivational interviewing and a stages of change framework as  
282 described above. Although this intervention and theoretical framework is similar in some  
283 respects to the peer navigation arm, the social work intervention is a single brief intervention  
284 with referral to treatment that may also rely on social work theory and practice. The peer  
285 navigation arm is distinguished by many unique aspects as outlined in sections above, and  
286 highlights that the person delivering the intervention may be as or more important than the  
287 intervention itself.

288 **C.4. Participant eligibility criteria, recruitment, and enrollment.** A consecutive sample of ED  
289 patients presenting to the RIH and TMH EDs will be assessed for eligibility. The RIH ED has 11  
290 full-time research assistants (RAs) available to recruit 24 hours per day, 7-days per week. At  
291 TMH ED, there are 3 full-time RAs available to recruit participants from 7 AM-11 PM, 7 days a  
292 week. Participants at TMH ED will be recruited during the hours in which social workers and  
293 RAs are available as described above. Participants will be identified by screening the ED’s  
294 electronic medical records (EMR) or by referrals from ED treating providers. Patients who meet  
295 the initial eligibility screen will undergo a further in-person assessment by a study RA.  
296 Participants will be eligible if they are: (1) English speaking, (2) 18 years of age or older, and (3)  
297 are being treated for an opioid overdose *or* identified as having had an opioid overdose in the  
298 past 12 months *or* are being treated for a visit related to illicit opioid use (e.g., abscess, opioid

299 withdrawal), (4) are identified as having an alcohol OR other drug use disorder (excluding  
300 marijuana) PLUS illicit opioid use in the past 6 months, (5) and are able to provide informed  
301 consent. Participants are ineligible if they are critically ill or injured, are previously enrolled in the  
302 trial, in police custody or incarcerated, pregnant, or live outside of Rhode Island or Southeastern  
303 Massachusetts where they primarily receive their care (patients must live in state OR within  
304 Southeastern Massachusetts but primarily receive care in Rhode Island to link to administrative  
305 database). Patients who are critically ill will be eligible once cleared by their physician.

306 **C.4.1. After screening, if the patient is eligible** and willing to participate, then full written informed  
307 consent will be obtained. After obtaining consent, the RA will randomly assign that patient (1:1  
308 allocation) to the peer navigation arm or the social work arm using sealed envelopes. The  
309 randomization schedule will consist of permuted block sizes stratified on gender and age. Both  
310 gender and age may be important determinants of the effectiveness of treatment, and will be  
311 examined as moderators in our exploratory analysis. This schedule will be maintained by the  
312 study analyst; neither the study PIs, nor the recruiting staff will be aware of the schedule. We  
313 anticipate the intervention will begin within 30 minutes of randomization.

314  
315

316 **C.4.2. Patients who decline** to be randomly assigned to one of the two treatment groups as part  
317 of the study are also eligible to be part of the “no intervention” control group. Such patients will  
318 be offered the opportunity to be assessed by either a peer navigator, social worker, or both. If  
319 they decline to be assessed by either a peer navigator or a social worker, they will be eligible to  
320 be in the control group. Eligible control patients will be asked for their permission to participate  
321 in follow-up assessments and other data collection procedures throughout the study period.

322

323 **C.4.3. Study assessments. Baseline assessments** in the EDs will collect information about  
324 socio-demographic characteristics, medical history, medication use, substance use, prior  
325 addiction treatment, pain symptoms, and depression. The survey forms may be RA or self-  
326 administered. Sections on more sensitive topics will be self-administered unless the participant  
327 requests that the research assistant administer it. Patients in the randomized group will receive  
328 a \$40 gift card on the day of enrollment for completing the baseline survey while those in the  
329 control group will receive a \$25 gift card for completing their baseline survey. See appendix for  
330 instruments.

331 Qualitative interviews will be conducted by telephone or in-person 2-10 days following  
332 enrollment in the ED. These audio-recorded interviews will take about 45 minutes to an hour to  
333 complete and participants will receive a \$50 gift card for their time. In-person interviews will be  
334 held at a Lifespan facility or a public community space that has been agreed upon by RA(s) and  
335 participant. Transportation in the form of cab voucher and RIPTA bus-pass will be provided to  
336 those requiring it.

337

338

339 **C.4.4. Qualitative-Interview Procedures:** The protocol will apply the same recruitment  
340 methodology as the Navigator study and patients will be approached after they have completed  
341 their assigned Navigator treatment arm, or after assessments for the control group. Navigator  
342 participants will be eligible for participation in the interviews if they have completed the baseline  
343 assessment and have been assigned to one of the intervention arms, and received the  
344 intervention in the ED, or control arms of the study, have a working telephone number or are  
345 prepared to return a Lifespan facility to participate in the patient interview protocol. Qualitative  
346 interview audio recordings will be transcribed by a HIPAA compliant transcription service.

347

348 **C.4.6 Qualitative Data Analysis**

349  
350 After the audio-recordings have been transcribed and cleaned by the RA, the investigators will  
351 to read the transcripts and meet on several occasion to conduct an iterative content analysis,  
352 based on the approach of the immersion-crystallization method of qualitative analysis. This  
353 qualitative approach involves individual followed by a larger group determination of emerging  
354 themes around the content of the interviews discussing the data as a group to determine  
355 emerging themes, salient across all groups, and also those themes reflected by the subgroups  
356 sampled. From this thematic analysis a code book will be developed and NVivo qualitative data  
357 coding software will be employed to manage and sort the data. Coding discrepancies emerging  
358 during investigators meeting will be discussed and resolved; to collectively determine the final  
359 code. Following NVivo analysis the investigators will meet to complete the interpretation of the  
360 themes.  
361

362 **C.5. Definition and operationalization of primary outcomes.** This RCT will have two primary  
363 endpoints: (1) 30-day treatment engagement, and (2) recurrent ED visits for an overdose. We  
364 will obtain objective assessments of these outcomes through the use of statewide administrative  
365 database as outlined below:

366 30-day treatment engagement (endpoint 1). The first primary outcome, engagement in addiction  
367 treatment, will be defined as the proportion who are admitted to a formal addiction treatment  
368 program within thirty days following the initial ED visit. This outcome was chosen because a  
369 key short-term goal of the ED behavioral intervention is to promote early treatment engagement.  
370 This outcome will be assessed using BHDDH and Prescription Drug Monitoring Program  
371 (PDMP) records. The BHDDH database contains information on all admissions to publicly  
372 funded substance abuse treatment programs in the state. We will define treatment engagement  
373 as admission to any of the program types licensed by BHDDH, including inpatient detoxification,  
374 day treatment programs, residential treatment, intensive outpatient services, and opioid  
375 treatment programs (i.e., methadone). Second, we will query the participant's RI PDMP records  
376 in order to identify enrollment in office-based buprenorphine therapy. The RI PDMP manages a  
377 database that contains information on all prescriptions for schedule II-IV substances filled in the  
378 state. The database is updated daily; all pharmacies are required to report prescriptions within  
379 48-hours of the fill date. The database includes information on the patient (e.g., name, sex, birth  
380 date, address including zip code), the prescription filled (e.g., quantity, days supply, national  
381 drug code number), and prescriber/pharmacy data. Pharmacies are required by law to report  
382 prescriptions to the PDMP regardless of payment type. All records will be linked  
383 deterministically to participant data using identifiable information (e.g., name, social security  
384 number) within the Stronghold computing environment, a HIPAA-compliant server maintained  
385 by Dr. Marshall's team at Brown University. Our research team has experience extracting and  
386 analyzing PMDP and BHDDH data for statewide surveillance purposes.<sup>72</sup>

387 Recurrent ED visits for overdose (endpoint 2). The second primary outcome, recurrent ED visit  
388 for overdose, will be defined as the proportion of participants who are treated in any Rhode  
389 Island ED for an opioid overdose at any time during the 18-month follow-up period following the  
390 initial ED visit. Recurrent ED visits for overdose were chosen as the second primary outcome  
391 as a long-term goal of the ED behavioral interventions is reduce fatal and non-fatal overdose.  
392 Two data sources will be used to assess this outcome. First, we will access the electronic  
393 medical records (EMRs) of the 12 EDs in Rhode Island through the Rhode Island Quality  
394 Institute Statewide Health Information Exchange. This data source will be made accessible  
395 through Brown's Advance-CTR Unified Research Data Sharing Access (URSA) infrastructure.  
396 This unified data system provides access to EMR data from all major health systems in Rhode  
397 Island. Thus, we will capture repeat visits for an opioid overdose that occur in all 12 EDs in  
398 Rhode Island. We will define an ED visit for an opioid overdose based on CDC guidelines for all



399 opioid poisonings (which includes illicit opioids) and utilizes International Classification of  
400 Disease (ICD) coding.<sup>73</sup> Second, we will query the RI Department of Health (RIDOH) Opioid 48-  
401 Hour Overdose Surveillance System. The RIDOH mandates all suspected opioid overdose  
402 cases presenting to an RI hospital be reported to the department within 48 hours.<sup>74</sup> This data  
403 source will capture recurrent overdoses not identified by ICD codes in the unified EMR data  
404 system, and also contains additional fields of interest (e.g., pre-existing risk factors for  
405 overdose).

406 **C.6. Statistical analyses.** For all analyses, routine procedures will first be conducted to ensure  
407 data accuracy/adequacy. We will use an intention-to-treat (ITT) approach in all analyses to  
408 address potential problems inherent in following only intervention completers; a sensitivity  
409 analysis (“per protocol”) will be conducted among only those that complete the ED intervention.  
410 Prior to examining intervention effects, we will first assess the success of randomization on pre-  
411 intervention characteristics using analyses of variance (ANOVA), with intervention group as the  
412 predictor variable. If there are differences in baseline characteristics, we will include these  
413 covariates in the primary outcome analyses, as described below. Given use of administrative  
414 data sources we anticipate minimal missingness in our final dataset. However, missing  
415 covariate data will be handled using multiple imputation performed in two stages using chained  
416 equations that specify the conditional models for all of the variables with missing values.<sup>75-77</sup>

417 **C.6.1. Effectiveness, 30-day engagement in treatment (primary endpoint 1a).** We will  
418 compare the effectiveness of the peer navigation versus social work intervention on increasing  
419 engagement in formal addiction treatment within 30 days of the initial ED visit. As the primary  
420 analysis, we will compare the proportion who are admitted to a licensed addiction treatment  
421 program (using chi-square analysis) between the two groups. Next, logistic regression models  
422 will be used to determine the independent effect of the intervention arm on 30-day treatment  
423 admission, adjusting for any baseline covariates as described above.

424 **C.6.2 Effectiveness, any behavioral intervention versus “no intervention” treatment**  
425 **(primary endpoint 1b).** We will conduct analyses similar to those described above to determine  
426 whether participants who receive any intervention have improved outcomes compared to those  
427 who refuse to receive any behavioral intervention. The primary independent variable of interest  
428 for Aim 1b is treatment versus control group membership. However, unlike Aim 1a (in which two  
429 randomized interventions are compared), patients non-random assignment (self-selection) into  
430 the control group. As such, we will need to account for factors that may be associated with  
431 refusing a behavioral intervention in the ED. We will use inverse probability of treatment weight  
432 (IPTW) techniques to account for: (1) baseline risk factors that predict control group  
433 membership, and (2) post-randomization confounding.

434

435 **C.6.3. Effectiveness, recurrent ED visit for an opioid overdose (primary endpoint 2).** We  
436 will compare the effectiveness of the peer navigation versus the social work intervention on  
437 preventing subsequent ED visits for opioid overdose. As the primary analysis, we will compare  
438 the overall proportion of patients experiencing a subsequent opioid overdose over the 18-month  
439 follow-up period between the intervention groups (using chi-square analysis). Next, logistic  
440 regression models will be used to determine the independent effect of the intervention arm on  
441 recurrent ED visits for opioid overdoses, adjusting for baseline covariates.

442 In **exploratory analyses**, we will also examine a number of other outcomes, including:  
443 overdose *rates*, overdose death (all overdose deaths in RI are analyzed by Dr. Marshall’s team  
444 and can be linked deterministically to patient data), and successful completion or retention in  
445 addiction treatment. Successful completion and/or retention in addiction treatment will be  
446 defined based on discharge data collected in BHOLD and prescription refill data in the PDMP

447 (e.g., on MAT for  $\geq 6$  months). We will examine the time to ED visit for an opioid overdose using  
448 a Kaplan-Meier analysis. Patients will be censored at the end of the 18-month follow-up period,  
449 considered the last point of contact. We will use Breslow's method to test if the time to  
450 subsequent opioid overdose rates differs between the groups. Next, Cox proportional hazards  
451 modeling will be used to estimate hazard ratios (HRs) and corresponding 95% confidence  
452 intervals (CIs) for occurrence of repeat overdose between groups. HRs will be adjusted for  
453 clinical and demographic characteristics believed to predict the outcome of opioid overdose in  
454 order to adjust for possible residual confounding and treatment-factor interactions. Finally, since  
455 participants may experience multiple opioid overdoses during follow-up, we will also conduct  
456 recurrent-event survival analyses.<sup>78</sup> These models extend the Cox model approach and allow  
457 for estimation of hazard ratios pooled across repeated periods at risk.<sup>79</sup> Finally, we will examine  
458 if heterogeneity of intervention effect is modified by age, sex, race, pre-existing chronic pain,  
459 past treatment history, and reason for presentation to the ED. We will perform stratified  
460 subgroup analyses to determine if treatment effects vary between groups of individuals.

461 **C.7. Feasibility and Sample Size Calculation.** First, we assume that ~2,000 patients will be  
462 treated at the RIH or TMH ED for an opioid overdose over the 24-month recruitment period; this  
463 is based on data from the RI Opioid Overdose Surveillance System and is a conservative  
464 estimate that does not include other eligibility criteria (e.g., recent overdose). Next, we assume  
465 that 65% (n=1,300) of these patients will be willing to be screened (prior studies of behavioral  
466 interventions for drug use at the RIH ED have had screening rates > 80%).<sup>80</sup> Third, we assume  
467 that ~50% (n=650) of these patients will be eligible and randomized to an intervention arm  
468 (n=325 per arm). Thus, we estimate that 24 months will be required to recruit 650 participants.  
469 Given our use of objective outcome data from administrative datasets, we do not expect dropout  
470 to significantly impact our statistical power, but our power calculations conservatively reflect a  
471 10% loss to follow-up rate. Will attempt to also enroll similar numbers in the control arm (n=325).

472 For our sample size calculation, we assumed that 7% of participants in the social work arm  
473 will enroll in a formal treatment program within 30 days of ED discharge (based on preliminary  
474 data from the state and RIH). Given this, we have >80% power to detect a two-fold increase  
475 (i.e., >7% absolute increase) in the rate of 30-day treatment engagement between the two arms  
476 (Figure 2A); this increase has been deemed a bench-mark by key state stakeholders. For  
477 primary endpoint 2 (recurrent ED visit for an opioid overdose), we assumed that 15% of patients  
478 in the social work arm will have a recurrent ED visit for an opioid overdose within 18-months of  
479 their first visit. This estimate is based on a chart review of 374 patients after program  
480 implementation of the RIH ED behavioral intervention program and in recently published data by  
481 Banta-Green et al.<sup>81</sup> The latter study from Washington State found around a 20% incidence of  
482 overdose within 18-months following of an initial ED visit. Our assumption of a 15% incidence of  
483 repeat ED visit for overdose is conservative compared to this finding, particularly in light of the  
484 fact the Rhode Island has nearly twice as many overdose deaths per capita than Washington  
485 State.<sup>82</sup> We will have >80% power to detect a 50% relative reduction (7.5% absolute reduction)  
486 in the risk of recurrent overdose within 18 months of their ED visit (Figure 2B), this reduction  
487 was felt to be clinically relevant and commensurate with statewide goals in reducing overdose  
488 via various strategies.  
489

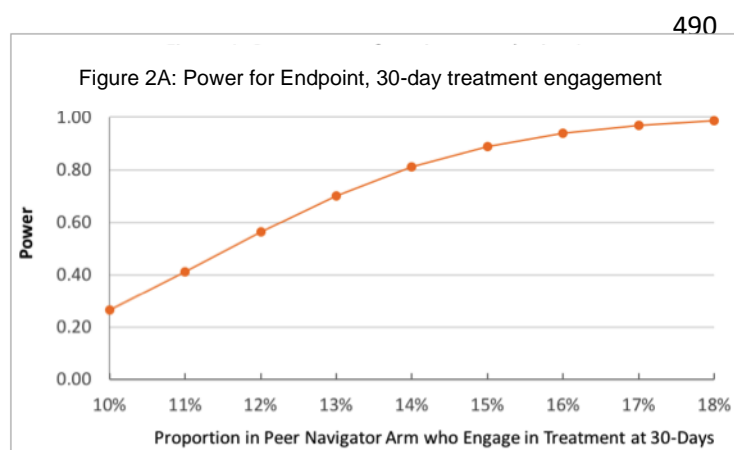

Design consideration, length of follow-up: We chose to evaluate outcome date within the first 18 months after the initial ED visit for two main reasons. First, the risk of recurrent overdose appears to level-off by about 18 months, meaning that most individuals who will

498 experience another overdose will do so within the first 18 months.<sup>81</sup> Second, given the urgent  
499 need to have an evidence-based evaluation of peer-led behavioral interventions for OUDs, a  
500 shorter length of follow-up would allow us to disseminate our study findings sooner. However,  
501 we recognize that there is potential value in having a longer follow-up period both from an  
502 impact standpoint and also in terms of statistical power to detect a difference between the  
503 treatment groups. Figure 2b compares the difference power in power between 18 and 30 month study  
504 endpoints (> 80% to detect a RR=0.5 for 18 months and RR=0.58 for 30 months; absolute rate  
505 of overdose in the intervention arm of ~7.5% at 18 months and ~11.5% at 30 months, note that  
506 this assumes an 20% incidence of overdose at 30 months). Therefore, as a contingency plan,  
507 we could extend the length of follow-up by one year (30 months total) based on 18 month  
508 outcome analyses. This is possible because of the use of administrative data for the outcomes  
509 assessment, but would require additional cost (approximately \$120,000). We propose to make  
510 this decision in conjunction with the LJA Foundation should this proposal be approved for  
511 funding.  
512

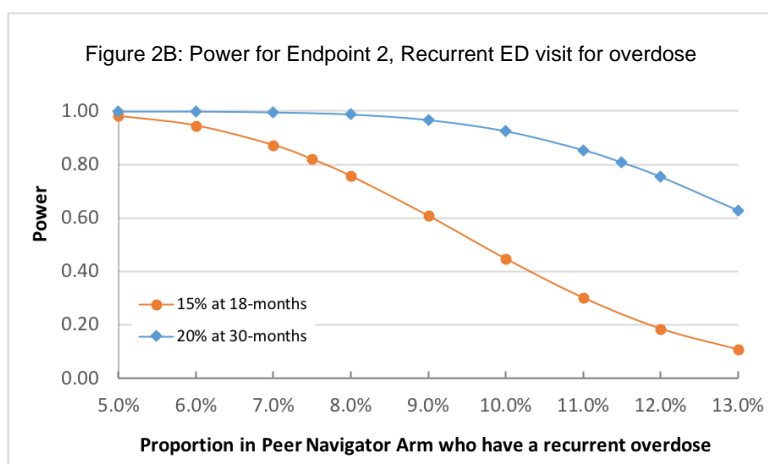

513  
514  
515  
516  
517  
518  
519  
520  
521  
522  
523  
524  
525  
526

## Appendix 1: Protocol for Navigator Patient Interviews

For use in both Rhode Island Hospital and The Miriam Hospital ED study sites.

527 *Purpose:* The purpose of the patient interviews is to understand the experiences of ED  
528 patients who have agreed to participate in the study after meeting study eligibility  
529 criteria. These will be semi-structured interviews to allow for patient directed reflections  
530 on the interactions they experienced as a patient before they were recruited into the  
531 study, the decision making that led them to agree to participate in the study, their  
532 experience with the peer navigator or social worker they were randomized to be

533 exposed to, and for those patients in the control group (declining either social worker or  
534 peer navigator), their reasons for not wanting to see either treatment option. The key  
535 research questions to be addressed in the qualitative portion of the navigator study are  
536 around the ED research experience , how this could be improved, and the effect that the  
537 Navigator study has on their motivation to engage in treatment, in the ED and after  
538 discharge, for their opioid use. Below are specific themes that the patient interview  
539 protocol will address:

- 540 1. What influences the patient to be part of the Navigator study- were their reasons  
541 apart from compensation?
- 542 2. What was their feedback about the Navigator process: assessment and  
543 randomization, follow up schedule and assessments? What could have been  
544 done better or differently?
- 545 3. How was the transition from the assessment to engaging with the peer navigator  
546 or social work handled (e.g. explanation of who they would be talking to and  
547 what that interaction would be like; length of time waiting for interaction)?
- 548 4. Before randomization, did the patients have a preference about talking to a social  
549 worker or peer navigator? What were the expectations about the intervention  
550 before it took place, and were there expectations met or altered after the  
551 intervention?
- 552 5. Had the patient, outside of the ED, talked to a social worker, peer navigator, or  
553 other resource about their opioid use? If yes, how did the experience in the ED  
554 patients compare to prior talks/counseling on their opioid use?
- 555 6. Did the patient engage with the peer navigator outside of the ED? If yes, why? If  
556 no, why? For patients assigned to the social work intervention, would it have  
557 been helpful to transition them into community treatment to have continued  
558 contact with the social worker after being discharged from the ED?
- 559 7. For all patients, at the time of being recruited into the Navigator study were they  
560 currently receiving any active treatment for their opioid use? If yes, what was it  
561 and how did this influence their decision to take part or not in the Navigator  
562 study?
- 563 8. For all patients, prior to being approached to take part in the study had any non-  
564 research ED staff (physicians, nurse practitioners, nurses, EMT) talk to them  
565 about their opioid use and suggest that they seek treatment? If yes, who was it  
566 and what were their responses to this suggestion?
- 567 9. For patients in the control arm, why did they refuse to talk to a peer navigator or  
568 social worker?
- 569 10. What are patients' expectations and tolerance for treatment for their opioid use  
570 as part of their ED visit (e.g. MAT) and after discharge (e.g. community  
571 treatment)?
- 572 11. If the patient was being treated for an OD, were they offered naloxone, how was  
573 that experienced by the patient ,and what was the patient's decision making  
574 process in accepting or not accepting naloxone?
- 575 12. What influenced the patient's decision to engage, or not, in treatment for their  
576 opioid use?

- 577 13. For patients treated for an unintentional opioid overdose, if they were offered  
578 naloxone, did they accept or refuse, and what influenced that decision  
579 14. For all patients, what was their overall ED treatment experience (for the patient's  
580 presenting complaint) and how did this influence them in their decision to take  
581 part in the study, and to agree or not to talk to a peer navigator or social worker?  
582 15. Did the patient perceive stigma at any point during their ED visit or as part of the  
583 Navigator study?

584 *Screening and recruitment.* The protocol will apply the same recruitment methodology  
585 as the Navigator study and patients will be approached after they have completed their  
586 assigned Navigator treatment arm, or after assessments for the control group. Navigator  
587 participants will be eligible for participation in the interviews if they have completed the  
588 baseline assessment and have been assigned to one of the intervention arms, and  
589 received the intervention in the ED, or control arms of the study, have a working  
590 telephone number or are prepared to return to a LifeSpan affiliated facility or public  
591 community space to participate in the patient interview protocol. We will use a selective  
592 sampling approach, where the RA will approach patients eligible to participate in the  
593 interviews from the recruitment schema below. At the time of consent in the ED into the  
594 navigator study the patient will be asked to consent to possibly be contacted to take  
595 part in the qualitative interview components of the study. Within 2-10 days after the ED  
596 visit, which will be sufficiently recent to remember the ED visit, and, for the peer  
597 navigator group, sufficient time will have passed to ensure that there has been at least  
598 one contact with the per navigator.

599 The RA will call a selected participant and ask if they would like to participate in the  
600 semi-structured interview will be conducted by phone or in-person and will be  
601 audiotaped for transcription and later analysis. Verbal consent will be obtained from the  
602 participant. The RA will give the option of completing the interview by phone or in  
603 person at a Lifespan facility or a public community space that has been agreed upon by  
604 RA(s) and participant. If the participant agrees to a telephone interview the RA will  
605 remind the participant that the interview will be audio-recorded, switch on the audio  
606 recorder and proceed with the verbal consent statement (see Procedures below).  
607 Alternatively an appointment for the in-person interview will be scheduled and the same  
608 verbal consent procedure will be conducted..

609 *Sample size for semi-structured interviews.* Based on literature on usability data  
610 exploring consumer feedback on new designs, interviews with up to five participants  
611 from each group of users is sufficient to provide detailed insight into positive and  
612 negative experiences before saturation of feedback is reached. Below is the schema  
613 for recruitment from the relevant patient constituents who will be interviewed (n= 30 in  
614 total). The current proportion of 25% female recruitment will be reflected in the sample  
615 interviewed. The RA will continue recruiting participants until all required subgroup cell  
616 numbers have been obtained.

617

|                                  |
|----------------------------------|
| Navigator participants<br>N = 30 |
|----------------------------------|

618

619

620

621

622

623

625

626

627

628

629

630

631

632

633

634

635

636

637

638

639

640

641

642

643

644

645

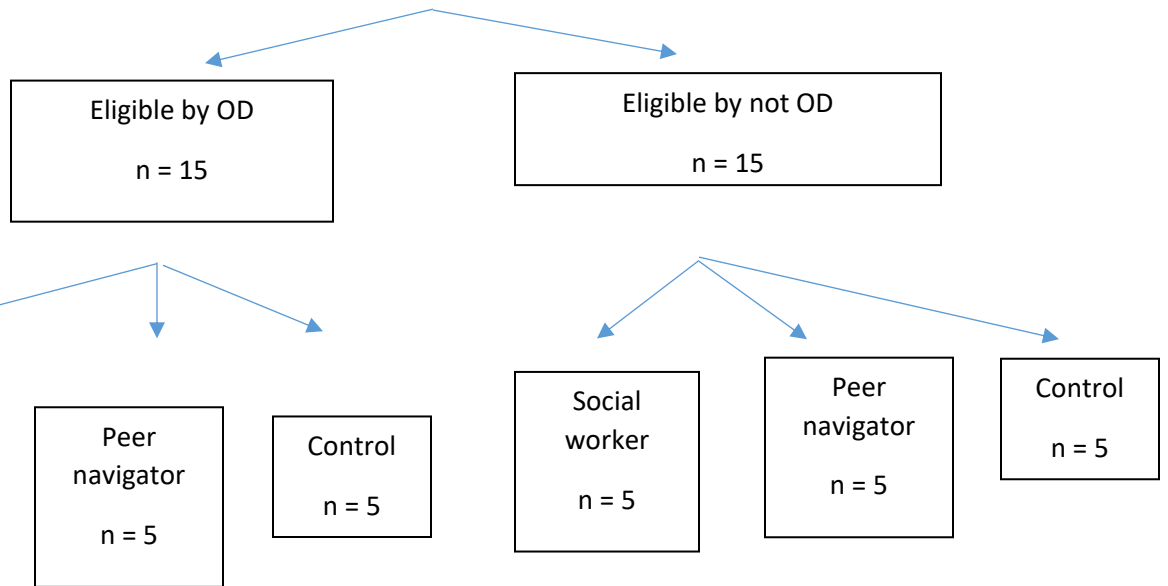

We anticipate hearing distinctly different reports of the overall ED treatment experience and reflections on the Navigator research and treatment experience in the three groups, regardless of eligibility criteria. We anticipate that the interviews will take between 45 minutes to an hour to complete, and to reflect this additional request on Navigator participants' time we will offer participants a \$50 gift card for participation. Participants will be offered transportation to bring them to the interview if they chose the in-person option. The participant data will be confidential and will not be linked with any other research data they provide as part of the main Navigator research study.

*Procedure.* At the start of the telephone or in-person interview the person will be reminded that the interview will be audio recorded and asked to consent to this- this consent will be repeated when the audio-recorder is activated. The following preamble will be recited to the participant:

**[TURN ON TAPE RECORDER; READ]:**  
**PREAMBLE/CONSENT [READ ALOUD, CONSENT MUST BE DOCUMENTED BY RESEARCH ASSISTANT]:** Hi, my name is [interviewer name] and I/m a member of the Navigator research team that will be conducting this interview with you today. We want to ask



646 you about your experiences of taking part in the Navigator study when you were treated in the  
647 emergency department at (RIH/TMH) on -----(date when participant was recruited). We would  
648 also like to ask you about your overall experience when you were treated in the emergency  
649 department at the time of your recruitment into this study.

650 *We will audio recorded this interview and have what you said transcribed just as you said it but*  
651 *without any information that could identify you or others to protect your confidentiality. This*  
652 *audio recording will be securely stored for data analysis purposes only and destroyed as soon*  
653 *as is possible after the analysis is complete. At any time, you can refuse to answer any question*  
654 *or chose to end the interview. Do you agree to be interviewed by me today?"*

655 Completing this interview will probably take 45 minutes to an hour of your time. There are a  
656 number of questions we would like you to answer y. There are no right or wrong answers, this  
657 is about your experiences.

658 There are no questions that should cause you any discomfort. Your taking part in this research  
659 interview is completely voluntary. You are free to choose not to complete or take part in this  
660 interview.

661 Your completion of this interview may not benefit you personally. We are hoping these  
662 completed interviews will provide information to help us to understand how the Navigator study  
663 could be improved to help others

664 The interviews from this study will be kept confidential. None of the information you provide will  
665 have your name or any number on it that will identify your personally.

666 If you have any questions about this interview or the research study itself, please feel free to ask  
667 the research assistant providing you with this information. Or you can call us at 444-4444.

668 If you have any questions about your rights as a research subject please feel free to call our  
669 Research Protections Office Director, Janice Muratori, at 444-6246.

670 After the participant has agreed to continue with the interview the researcher will  
671 implement the semi-structured interview guide (see Appendices 2 and 3). When the  
672 interview is completed the participant will then be compensated and thanked for their  
673 involvement; study staff will upload the audio file for transcription, and complete the staff  
674 field notes and debriefing questions of the post-interview debriefing form (see Appendix  
675 4) as to capture their perceptions of the overall interview.

676

677

678 **Appendix 2: Interview Guide for Navigator Study: Patient Assigned to Social Work**  
679 **or Peer Navigator Intervention**

680

681 **[TURN ON TAPE RECORDER; READ]:**  
682 **PREAMBLE/CONSENT [READ ALOUD, CONSENT MUST BE DOCUMENTED BY**  
683 **RESEARCH ASSISTANT]:** Hi, my name is [interviewer name] and I/m a member of

684 the Navigator research team that will be conducting this interview with you today. We  
685 want to ask you about your experiences of taking part in the Navigator study when you  
686 were treated in the emergency department at (RIH/TMH) on -----(date when participant  
687 was recruited). We would also like to ask you about your overall experience when you  
688 were treated in the emergency department at the time of your recruitment into this  
689 study.

690 *We will audio recorded this interview and have what you said transcribed just as you*  
691 *said it but without any information that could identify you or others to protect your*  
692 *confidentiality. This audio recording will be securely stored for data analysis purposes*  
693 *only and destroyed as soon as is possible after the analysis is complete. At any time,*  
694 *you can refuse to answer any question or chose to end the interview. Do you agree to*  
695 *be interviewed by me today?"*

696 Completing this interview will probably take 45 minutes to an hour of your time. There  
697 are a number of questions we would like you to answer verbally. There are no right or  
698 wrong answers, this is about your experiences.

699 There are no questions that should cause you any discomfort. Your taking part in this  
700 research interview is completely voluntary. You are free to choose not to complete or  
701 take part in this interview.

702 Your completion of this interview may not benefit you personally. We are hoping these  
703 completed interviews will provide information to help us to understand how the  
704 Navigator study could be improved to help others

705 The interviews from this study will be kept confidential. None of the information you  
706 provide will have your name or any number on it that will identify your personally.

707 If you have any questions about this interview or the research study itself, please feel  
708 free to ask the research assistant providing you with this information. Or you can call us  
709 at 444-4444.

710 If you have any questions about your rights as a research subject please feel free to call  
711 our Research Protections Office Director, Janice Muratori, at 444-6246.

712 No one outside of this study will have access to these recordings and they will be  
713 destroyed after our final report is written. **Just to confirm, is it OK that we record**  
714 **this? Do you consent to participate and agree to proceed? Yes No**  
715 **(document)**

716 **Do you have any questions before we begin?**

717

718 OK, this is [interviewer name] conducting an interview with [name/ID] on [date] at  
719 about [time].

720

721

722

## 723 SECTION 1: INTRODUCTION

724

725 **1. INTRO:** To get started, can you tell me why you wanted to participate in this  
726 interview today?

727

- 728 **2. Terms intro:** Those are all good reasons. Now, just so we are on the same page for  
729 our discussion today, when I use the terms OPIOID I'll be talking about drugs/  
730 prescription medications like Percocet, oxycodone, heroin, or fentanyl, that can  
731 cause an overdose or that people can become dependent on. And when I say  
732 NALOXONE or its other name, NARCAN, I'll be talking about the medication that  
733 can reverse opioid overdose.
- 734 **3. Research assistant:** When you were in the emergency department at (RIH/TMH)  
735 on (date) you were recruited into the Navigator study. The person who asked you to  
736 be part of the study is the research assistant and I'll be mentioning that person as  
737 part of this conversation.
- 738 **4. Treatment arm:** After you answered questions you were randomized to either see a  
739 social worker or a peer navigator, you might call this person the Anchor recovery  
740 coach or counselor. Who did you see? (confirm randomization). I'm going to be  
741 referring to the social worker or the Anchor person/peer navigator as part of our  
742 conversation.

743  
744

Any questions so far?

## SECTION 2: Navigator study participation experience

745

***Please go through what you did with the research assistant in taking part in the Navigator study when you were in the ED, before you talked to the social worker/peer navigator.***

749

**Probes:** What were some things that you were being asked to do that weren't clear to you?

751

What are your thoughts about the survey questions you answered? What do you think the survey questions were getting at?

752

Why do you think you're being asked to keep in contact with the study and answer more survey questions?

753

What do you get out of being part of this study?

754

After hearing about the study, did you feel pressured to participate?

755

**Probes (General) :** *Tell me more about that.*

756

*How did you feel about that?*

757

*What do you mean when you say [xxx]?*

758

759

760

## SECTION 3a: Treatment arm experience- social work

761

**After you were randomized you were told that a social worker would be talking to you about your opioid use. What was that like to talk to the social worker about your opioid use?**

762

763

764

765

766

**You only talked to the social worker that night, what were your thoughts about talking to the social worker again or anyone else afterwards about using opioids?**

767

768

769

770

771

772

773

774  
775  
776  
777  
778  
779  
780  
781  
782  
783  
784  
785  
786  
787  
788  
789  
790  
791  
792  
793  
794  
795  
796  
797  
798  
799  
800  
801  
802  
803  
804  
805  
806  
807  
808  
809  
810  
811  
812  
813  
814  
815  
816  
817  
818  
819

**What, if anything, did you take away from the talk you had with the social worker?**

**Probes:** What were you thinking and feeling when you were told that you would be speaking to a social worker about your opioid use?

Have you ever talked to a social worker or anyone else about your opioid use or about anything else?

What was different about talking to that social worker that to anyone else you've talked to about your opioid use?

What do you think you got out of that talk compared to the social worker??

When you think back, what do you wish you had to talked to the social worker about but held back from?

Tell me about anything that changed for you about your opioid use after you talked to the social worker?

Describe anything that was being suggested to you about changing your opioid use you were uncomfortable with?

What's your thoughts on patients being offered counseling in the ED about their opioid use?

Are you familiar with Peer Navigators? If so, what have you heard? If you had the choice, would you have preferred to speak with a Peer Navigator?

**Probes (General) :** *Tell me more about that.*

*How did you feel about that?*

*What do you mean when you say [xxx]?*

**SECTION 3b: Treatment arm experience- peer navigator**

**After you were randomized you were told that a peer navigator (or term participant uses) would be talking to you about your opioid use. What was that like to talk to the peer navigator (or term that participant uses) about your opioid use?**

**What, if anything, did you take away from the talk you had with the peer navigator?**

**Peer navigators usually stay in contact after a person has left the ED, what's been your contact with the peer navigator?**

**Probes:** What were you thinking and feeling when you were told that you would be speaking to a peer navigator about your opioid use?

Have you ever talked to a peer navigator or anyone else about your opioid use or about anything else?

Have you continued to keep contact with the peer navigator?

What was different about talking to that peer navigator that to anyone else you've talked to about your opioid use?

820 What do you think you got out of that talk compared to talking to the peer  
821 navigator?

822 When you think back, what do you wish you had to talked to the peer navigator  
823 about but held back from?

824 Tell me about anything that changed for you about your opioid use after you  
825 talked to the peer navigator?

826 Describe anything that was being suggested to you about changing your opioid  
827 use you were uncomfortable with?

828 What's your thoughts on patients being offered counseling in the ED about their  
829 opioid use?

830 Ig given the choice, would have preferred to speak to a social worker over the  
831 peer navigator?

832

833 **Probes (General) :** *Tell me more about that.*

834 *How did you feel about that?*

835 *What do you mean when you say [xxx]?*

836 **SECTION 4: Opioid use treatment in the ED and community**

837

838 **During your time in the ED tell me about your experiences with the doctors,**  
839 **nurses or EMTs around your opioid use.**

840

841 **Did you discuss treatment or help you could get in the ED or in the community for**  
842 **your opioid use?**

843

844 **Have you ever been in treatment for your opioid use? What kind? How do you**  
845 **view your treatment experience(s)?**

846

847 **Probes:** Describe the discussion you had with (*probe who this was*).

848 How did you feel about that discussion?

849 Describe anything that was being suggested to you about changing your opioid use you  
850 were uncomfortable with?

851 What treatment options were offered, in the ED (MAT?), or elsewhere?

852

853 Have you ever been on medication for addiction treatment (methadone, buprenorphine  
854 (Suboxone), naltrexone?)

855

856

857 **Probes (General) :** *Tell me more about that.*

858 *How did you feel about that?*

859 *What do you mean when you say [xxx]?*

860

861 **SECTION 5: Naloxone in the ED**

862

863 **I talked about naloxone when we started our conversation.**

864 **When you were in the ED, were you offered naloxone to take home with you ?**

865 **What were your thoughts about being offered naloxone?**

866  
867 **Probes:** Before the ED visit had you gotten naloxone before?  
868 (If naloxone offered and given ). Tell me why you decided to take naloxone home with  
869 you?  
870 (If naloxone not offered). What are your thoughts about not being offered naloxone to  
871 take home?  
872 (If naloxone offered and refused ). Tell me about your decision not to take naloxone  
873 home with you.  
874 Did you have a family member or friend with you?  
875 Did you believe that there would be a cost associated with accepting the naloxone?  
876  
877 Do you carry naloxone?  
878  
879 **Probes (General) :** *Tell me more about that.*  
880 *How did you feel about that?*  
881 *What do you mean when you say [xxx]?*  
882

## SECTION 6: Overall ED and treatment experience

883  
884  
885 **Apart from the Navigator study how would you describe your overall ED**  
886 **experience ?**  
887 **How did that experience influence whether you accepted services in the ED?How**  
888 **did that experience influence your decision to take part in the Navigator study?**  
889 **Probes:**  
890 Where were you seen in the emergency department?  
891 What would have helped you when you were in the emergency department?  
892 Were you worried about anything?  
893 What do you think would benefit people in the emergency department who have  
894 had an overdose? What do you think will help people?  
895 What do you think should be priorities when people are treated after an opioid  
896 overdose?  
897 Describe anything that you were emotionally uncomfortable with?  
898  
899 **Probes (General) :** *Tell me more about that.*  
900 *How did you feel about that?*  
901 *What do you mean when you say [xxx]?*  
902

## SECTION 7: Stigma

903  
904  
905 **Many individuals feel stigmatized by others when they find out they use drugs.**  
906 **Tell me about your experiences around stigma when people know you use drugs.**  
907 **What do people do or say that makes you feel stigmatized?**  
908 **Did you experience any stigma while you were in the emergency department?**  
909 **Probes:**  
910 How do you think your experience of stigma in the emergency department impacted the  
911 medical care you received?



912 How did your experience of stigma impact services provided to you for your opioid use?  
913 How did this impact whether you wanted to accept services offered?  
914 What do you think could have improved your experience?

915  
916 During the navigator study what experiences did you have of being stigmatized?  
917 What could the ED or Navigator study do differently to make patients feel less  
918 stigmatized?

919 **Probes (General) :** *Tell me more about that.*  
920 *How did you feel about that?*  
921 *What do you mean when you say [xxx]?*

922  
923  
924 **CONCLUDING QUESTION:** Is there anything else related to your feelings about the  
925 emergency department services or the study that you would like to talk about today?  
926

927 ***Thank you for participating in this interview your answers will help us with our***  
928 ***study.***

929  
930  
931  
932  
933  
934  
935  
936  
937  
938  
939  
940  
941  
942  
943  
944  
945  
946  
947  
948

949 **Appendix 3: Interview Guide for Navigator Study: Patient Assigned to Patient**  
950 **Assigned to Control Group**

951  
952 **[TURN ON TAPE RECORDER; READ]:**

953 **PREAMBLE/CONSENT [READ ALOUD, CONSENT MUST BE DOCUMENTED BY**  
954 **RESEARCH ASSISTANT]:** Hi, my name is [interviewer name] and I/m a member of the  
955 Navigator research team that will be conducting this interview with you today. We want to ask  
956 you about your experiences of taking part in the Navigator study when you were treated in the

957 emergency department at (RIH/TMH) on -----(date when participant was recruited). We would  
958 also like to ask you about your overall experience when you were treated in the emergency  
959 department at the time of your recruitment into this study.

960 *We will audio recorded this interview and have what you said transcribed just as you said it but*  
961 *without any information that could identify you or others to protect your confidentiality. This*  
962 *audio recording will be securely stored for data analysis purposes only and destroyed as soon*  
963 *as is possible after the analysis is complete. At any time, you can refuse to answer any question*  
964 *or chose to end the interview. Do you agree to be interviewed by me today?"*

965 Completing this interview will probably take 45 minutes to an hour of your. There are a number  
966 of questions we would like you to answer verbally. There are no right or wrong answers, this is  
967 about your experiences.

968 There are no questions that should cause you any discomfort. Your taking part in this research  
969 interview is completely voluntary. You are free to choose not to complete or take part in this  
970 interview.

971 Your completion of this interview may not benefit you personally. We are hoping these  
972 completed interviews will provide information to help us to understand how the Navigator study  
973 could be improved to help others

974 The interviews from this study will be kept confidential. None of the information you provide will  
975 have your name or any number on it that will identify your personally.

976 If you have any questions about this interview or the research study itself, please feel free to ask  
977 the research assistant providing you with this information. Or you can call us at 444-4444.

978 If you have any questions about your rights as a research subject please feel free to call our  
979 Research Protections Office Director, Janice Muratori, at 444-6246.

980 No one outside of this study will have access to these recordings and they will be destroyed  
981 after our final report is written. **Just to confirm, is it OK that we record this? Do you**  
982 **consent to participate and agree to proceed? Yes No (document)**

983 **Do you have any questions before we begin?**

984

985 OK, this is [interviewer name] conducting an interview with [name/ID] on [date] at about  
986 [time].

## 987 SECTION 1: INTRODUCTION

988

989 **5. INTRO:** To get started, can you tell me why you wanted to participate in this interview  
990 today?

991

992 **6. Terms intro:** Those are all good reasons. Now, just so we are on the same page for our  
993 discussion today, when I use the terms OPIOID I'll be talking about drugs/prescription  
994 medications like Percocet, oxycodone, heroin, or fentanyl, that can cause an overdose or

995 that people can become dependent on. And when I say NALOXONE or its other name,  
996 NARCAN, I'll be talking about the medication that can reverse opioid overdose.

997 **7. Research assistant:** When you were in the emergency department at (RIH/TMH) on (date)  
998 you were recruited into the Navigator study. The person who asked you to be part of the  
999 study is the research assistant and I'll be mentioning that person as part of this  
1000 conversation.

1001 **8. Control arm:** After you answered questions, you decided not to see either a social worker  
1002 or a peer navigator, you might also call this person the Anchor recovery coach or counselor.  
1003 I just want to confirm that when you took part in this study in the ED you did not talk to either  
1004 a social worker or a peer navigator (confirm control arm). I'm going to be referring to the  
1005 social worker or the Anchor person/peer navigator as part of our conversation.

1006  
1007 Any questions so far?  
1008

## 1009 **SECTION 2: Navigator study participation experience**

1010  
1011 ***Please go through what you did with the research assistant in taking part in the***  
1012 ***Navigator***  
1013 ***study when you were in the ED.***  
1014

1015 **Probes:** What were some things that you were being asked to do that weren't clear to  
1016 you?

1017 What are your thoughts about the survey questions you answered? What do  
1018 you think the survey questions were getting at?

1019 Why do you think you're being asked to keep in contact with the study and  
1020 answer more survey questions?

1021 What do you get out of being part of this study?

1022 After hearing about the study, did you feel pressured to participate?  
1023

1024 **Probes (General):** *Tell me more about that.*

1025 *How did you feel about that?*

1026 *What do you mean when you say [xxx]?*  
1027

## 1028 **SECTION 3: Decision not to take up Navigator treatment offer**

1029  
1030 **Can you tell me about your decision not to talk to social worker or a recovery coach**  
1031 **in the ED?**  
1032

1033 **Who else might you have talked to about your opioid use during that ED visit?**  
1034

1035 **Probes:** How were you feeling when you were seen in the emergency department?  
1036 Were you uncomfortable? In pain? In opioid withdrawal?

1037 What were you thinking and feeling when you were told that you could speak to a social  
1038 worker or peer navigator about your opioid use?

1039 Have you ever talked to a social worker, recovery coach, or anyone else about your  
1040 opioid use?

1041 Why did you not want to talk to the social worker or the recovery coach?

1042 Did prior experiences from family and/or friends with receiving either of these services  
1043 influence your decision?

1044 Did you believe that talking to either a social worker or recovery coach would lengthen  
1045 your hospital stay and possibly lead to a hospital admission?  
1046 When you think back now on the decision you made, what do think?  
1047 Since that ED visit, have you talked to anyone about your opioid use?  
1048 What are your thoughts on patients being offered counseling in the ED about their opioid  
1049 use?  
1050 What do you think ED counseling around opioid use and opioid overdose should be like?

1051  
1052 **Probes (General):** *Tell me more about that.*  
1053 *How did you feel about that?*  
1054 *What do you mean when you say [xxx]?*  
1055

#### SECTION 4: Opioid use treatment in the ED and community

1056  
1057  
1058 **During your time in the ED tell me about your experiences with the doctors, nurses or**  
1059 **EMTs around your opioid use.**

1060  
1061 **Did you discuss treatment or help you could get in the ED or in the community for your**  
1062 **opioid use?**

1063  
1064 **Have you ever been in treatment for your opioid use? What kind? How do you view your**  
1065 **treatment experience(s)?**

1066  
1067 **Probes:** Describe the discussion you had with (*probe who this was*).  
1068 How did you feel about that discussion?  
1069 Describe anything that was being suggested to you about changing your opioid use you were  
1070 uncomfortable with?  
1071 What treatment options were offered, in the ED (MAT?), or elsewhere?  
1072 Have you ever been on medication for addiction treatment (methadone, buprenorphine  
1073 (Suboxone), naltrexone?)

1074  
1075 **Probes (General):** *Tell me more about that.*  
1076 *How did you feel about that?*  
1077 *What do you mean when you say [xxx]?*  
1078

#### SECTION 5: Naloxone in the ED

1079  
1080  
1081 **I talked about naloxone when we started our conversation.**

1082  
1083 **When you were in the ED, were you offered naloxone to take home with you?**

1084  
1085 **What were your thoughts about being offered naloxone?**

1086  
1087  
1088 **Probes:** Before the ED visit had you gotten naloxone before?  
1089 (If naloxone offered and given). Tell me why you decided to take naloxone home with you?  
1090 (If naloxone not offered). What are your thoughts about not being offered naloxone to take  
1091 home?  
1092 (If naloxone offered and refused). Tell me about your decision not to take naloxone home with  
1093 you.

1094 Did you have a family member or friend with you?  
1095 Did you believe that there would be a cost associated with accepting the naloxone?  
1096  
1097 Do you carry naloxone?

1098  
1099 **Probes (General):** *Tell me more about that.*  
1100 *How did you feel about that?*  
1101 *What do you mean when you say [xxx]?*  
1102

## SECTION 6: Overall ED and treatment experience

1103  
1104  
1105 **Apart from the Navigator study, how would you describe your overall ED experience?**  
1106 **How did that experience influence whether you accepted services in the ED?**  
1107 **How did that experience influence your decision to take part in the Navigator study?**

1108 **Probes:**  
1109 Where were you seen in the emergency department?  
1110 What would have helped you when you were in the emergency department?  
1111 Were you worried about anything?  
1112 What do you think would benefit people in the emergency department who have had an  
1113 overdose? What do you think will help people?  
1114 What do you think should be priorities when people are treated after an opioid  
1115 overdose?  
1116 Describe anything that you were emotionally uncomfortable with?

1117  
1118 **Probes (General):** *Tell me more about that.*  
1119 *How did you feel about that?*  
1120 *What do you mean when you say [xxx]?*  
1121

## SECTION 7: Stigma

1122  
1123  
1124 **Many individuals feel stigmatized by others when they find out they use drugs. Tell me**  
1125 **about your experiences around stigma when people know you use drugs.**

1126 **What do people do or say that makes you feel stigmatized?**

1127 **Did you experience any stigma while you were in the emergency department?**

1128 **Probes:** How do you think your experience of stigma in the emergency department impacted  
1129 the medical care you received?  
1130 How did your experience of stigma impact services provided to you for your opioid use?  
1131 How did this impact whether you wanted to accept services offered?  
1132 What do you think could have improved your experience?  
1133 During the Navigator study what experiences did you have of being stigmatized?  
1134 What could the ED or Navigator study do differently to make patients feel less stigmatized?  
1135

1136 **Probes (General):** *Tell me more about that.*  
1137 *How did you feel about that?*  
1138 *What do you mean when you say [xxx]?*  
1139

1140

1141 **CONCLUDING QUESTION:** Is there anything else related to your feelings about the emergency  
1142 department services or the study that you would like to talk about today?

1143

1144 ***Thank you for participating in this interview your answers will help us with our study*** and  
1145 improve emergency department care.

1146

1147

1148

1149

1150

1151

1152

1153

1154

1155

1156

1157

1158

1159

1160

1161

1162

1163

1164

1165

1166

1167

1168

1169

1170 **Appendix 4: Qualitative Interview Debriefing Form**

1171

1172

1173 To be completed by research staff conducting the patient interview.

1174

1175 Interviewer Name:

1176 Date:



1177 Time:  
1178 Location:  
1179 Participant ID:

1180  
1181  
1182 General impressions of the overall interview: (Include environmental factors such as  
1183 noise, distractions; notes on if you covered the full guide, any challenges with the guide  
1184 or process that can be improved upon, etc.)  
1185

1186  
1187  
1188  
1189  
1190 Key Take-aways: What was especially interesting about this interview? What surprised  
1191 you and what did you learn?  
1192

1193  
1194  
1195  
1196  
1197  
1198 Unanswered questions: What did the interview leave you curious to know more about?  
1199

1200  
1201  
1202  
1203  
1204  
1205  
1206  
1207  
1208  
1209  
1210  
1211  
1212

## 1213 Appendix 5: **Qualitative Interview Audio Recordings Protocol**

### 1214 **Uploading Audio:**

- 1216 1) Visiting site of transcription service.  
1217
- 1218 2) Complete the form
  - 1219 a. Company Name: Rhode Island Hospital
  - 1220 b. Your email <<lifespan email>>
  - 1221 c. Project name: <<study name>>

1222 d. Instructions: <<instructions or tips for transcription. **Indicate if the**  
1223 **transcriptionist should use generic placeholders.** It is suggested to list  
1224 commonly referenced phrases, locations, or slang which may be difficult  
1225 for the transcriptionist to capture. Examples could include: Subes/  
1226 Suboxone; boot (i.e. to inject drugs intravenously). You may also list a  
1227 priority order if uploading multiple files, or indicate that you would like  
1228 expedited transcription services (for an additional fee)>>

1229  
1230 3) Select files using the file uploader on the right hand side of the screen. Drag and  
1231 drop, or select files and folders. Click the orange “Start Upload” button at the  
1232 bottom right.

1233  
1234 4) There is a progress bar and an ETA to help you gauge the progress of your  
1235 upload. Wait for confirmation that the files have uploaded. The message will read  
1236 “# files have successfully finished uploading. The recipient will now be notified of  
1237 your files arriving.” Once this message is received, the upload is complete.

1238  
1239 5) Point person forwards the upload notification to the point of contact on the upload  
1240 form. If you do not receive this confirmation from the point person, please contact  
1241 transcription service to confirm the package was received.

1242  
1243 **Note: the file upload is a secured network, but transcripts are returned by regular**  
1244 **email. Please indicate in the instructions whether the transcriptionist should us a**  
1245 **generic placeholder for names which appear in the audio file.**

1246  
1247 **Receiving Transcriptions:**

1248  
1249 1) You will receive an email with the transcripts. Save them as password protected  
1250 documents in the appropriate shared drive.

1251  
1252 2) Review the transcripts against the audio file for accuracy. Use track changes.

1253  
1254 3) Review every transcript for anonymity (as appropriate for the project). Replace  
1255 names and specific locations which may be identifying with placeholders like  
1256 “NAME” or “CITY IN Rhode Island.”

1257  
1258 4) Format the document appropriately. Confirm that there is continuous line  
1259 numbers and page numbers in the document. Add the participant number or  
1260 focus group name to the header. If track changes were used to make edits to  
1261 transcript content, save a clean copy. Name the files like: name of project  
1262 transcript\_participant ID.

1263  
1264  
1265 **Commonly used words for Dr. Francesca Beaudoin’s Studies:**

1266 **You may use items on this list to help complete the Instructions section of the**  
1267 **upload form. Providing the transcriptionist context and jargon or location specific**  
1268 **language will help ensure a more accurate transcription.**

1269  
1270 “Dear transcriptionist, please note that these interview are with people who use drugs,  
1271 so there may be some jargon related to drug use or local resources. There is a list for  
1272 your reference below:”

- 1273  
1274 • ED/ER: Emergency Department/Emergency Room  
1275 • OD: overdose  
1276 • RA: Research Assistant  
1277 • Opioid(s): class of medications  
1278 • Percocet, Percs: a type of medication  
1279 • Oxycodone, Oxys: a type of medication  
1280 • Subes/ Suboxone: a type of medication  
1281 • Benzo/ Benzodiazapine: a type of medication  
1282 • Naloxone: a type of medication  
1283 • Narcan: a type of medication  
1284 • Peer Navigator/Coach: a type of counselor

1285  
1286  
1287  
1288  
1289  
1290  
1291  
1292  
1293  
1294  
1295  
1296  
1297  
1298  
1299  
1300  
1301  
1302  
1303

#### 1304 **REFERENCES CITED**

1305  
1306 1. Overdose Death Rates. 2017. (Accessed January 7, 2017, at  
1307 <https://www.drugabuse.gov/related-topics/trends-statistics/overdose-death-rates.>)  
1308 2. Rudd RA, Aleshire N, Zibbell JE, Gladden RM. Increases in Drug and Opioid Overdose  
1309 Deaths--United States, 2000-2014. MMWR Morbidity and mortality weekly report  
1310 2016;64:1378-82.

- 1311 3. SAMHSA. Drug Abuse Warning Network, 2011: National Estimates of Drug-Related  
1312 Emergency Department Visits. Rockville, MD: Substance Abuse and Mental Health  
1313 Services Administration; 2013.
- 1314 4. Stoové M, Dietze P, Jolley D. Overdose deaths following previous nonfatal heroin  
1315 overdose: record linkage of ambulance attendance and death registry data. *Drug Alcohol*  
1316 *Rev* 2009;28:347-52.
- 1317 5. Pavarin RM, Berardi D, Gambini D. Emergency department presentation and mortality  
1318 rate due to overdose: A retrospective cohort study on nonfatal overdoses. *Subst Abus*  
1319 *2016*;37:558-63.
- 1320 6. Gjersing L, Jonassen K, Skurtveit S, Bramness J, Clausen T. Emergency service use is  
1321 common in the year before death among drug users who die from an overdose. *J Subst*  
1322 *Use* 2017;22:331-6.
- 1323 7. Wagner KD, Liu L, Davidson PJ, Cuevas-Mota J, Armenta RF, Garfein RS. Association  
1324 between non-fatal opioid overdose and encounters with healthcare and criminal justice  
1325 systems: Identifying opportunities for intervention. *Drug and alcohol dependence*  
1326 *2015*;153:215-20.
- 1327 8. Samuels E. Emergency department naloxone distribution: a Rhode Island department of  
1328 health, recovery community, and emergency department partnership to reduce opioid  
1329 overdose deaths. *Rhode Island medical journal* 2014;97:38-9.
- 1330 9. Galanter M, Dermatis H, Egelko S, De Leon G. Homelessness and mental illness in a  
1331 professional- and peer-led cocaine treatment clinic. *Psychiatr Serv* 1998;49:533-5.
- 1332 10. Huselid RF, Self EA, Gutierrez SE. Predictors of successful completion of a halfway-  
1333 house program for chemically-dependent women. *The American journal of drug and*  
1334 *alcohol abuse* 1991;17:89-101.
- 1335 11. Tracy K, Burton M, Miescher A, et al. Mentorship for Alcohol Problems (MAP): a peer to  
1336 peer modular intervention for outpatients. *Alcohol and alcoholism* 2012;47:42-7.
- 1337 12. Jason LA, Olson BD, Ferrari JR, Lo Sasso AT. Communal housing settings enhance  
1338 substance abuse recovery. *American journal of public health* 2006;96:1727-9.
- 1339 13. Tracy K, Wallace SP. Benefits of peer support groups in the treatment of addiction.  
1340 *Substance abuse and rehabilitation* 2016;7:143-54.
- 1341 14. Manning V, Best D, Faulkner N, et al. Does active referral by a doctor or 12-Step peer  
1342 improve 12-Step meeting attendance? Results from a pilot randomised control trial. *Drug*  
1343 *and alcohol dependence* 2012;126:131-7.
- 1344 15. Zemore SE, Kaskutas LA. 12-step involvement and peer helping in day hospital and  
1345 residential programs. *Substance use & misuse* 2008;43:1882-903.
- 1346 16. Rhode Island Overdose Prevention and Intervention Task Force Action Plan. 2017.
- 1347 17. Recovery coaches at ERs try to help opioid addicts avoid another overdose. 2017. at  
1348 [https://www.washingtonpost.com/national/health-science/recovery-coaches-at-ers-try-to-](https://www.washingtonpost.com/national/health-science/recovery-coaches-at-ers-try-to-help-opioid-addicts-avoid-another-overdose/2017/07/21/6568d1d0-602d-11e7-84a1-a26b75ad39fe_story.html?utm_term=.ac809ea58f33)  
1349 [help-opioid-addicts-avoid-another-overdose/2017/07/21/6568d1d0-602d-11e7-84a1-](https://www.washingtonpost.com/national/health-science/recovery-coaches-at-ers-try-to-help-opioid-addicts-avoid-another-overdose/2017/07/21/6568d1d0-602d-11e7-84a1-a26b75ad39fe_story.html?utm_term=.ac809ea58f33)  
1350 [a26b75ad39fe\\_story.html?utm\\_term=.ac809ea58f33.](https://www.washingtonpost.com/national/health-science/recovery-coaches-at-ers-try-to-help-opioid-addicts-avoid-another-overdose/2017/07/21/6568d1d0-602d-11e7-84a1-a26b75ad39fe_story.html?utm_term=.ac809ea58f33))
- 1351 18. Strategies to Combat the Opioid Epidemic. 2017. at  
1352 [https://www.povertyactionlab.org/sites/default/files/documents/Final\\_Opioid%20Brief\\_1.5](https://www.povertyactionlab.org/sites/default/files/documents/Final_Opioid%20Brief_1.5)  
1353 [.17.pdf.](https://www.povertyactionlab.org/sites/default/files/documents/Final_Opioid%20Brief_1.5))
- 1354 19. Rudd RA, Seth P, David F, Scholl L. Increases in Drug and Opioid-Involved Overdose  
1355 Deaths - United States, 2010-2015. *MMWR Morbidity and mortality weekly report*  
1356 *2016*;65:1445-52.
- 1357 20. IMS Institute for Healthcare Informatics. Medicines Use and Spending in the U.S. ,À A  
1358 Review of 2015 and Outlook to 2020. April 2016. (Accessed 12/6/2016, at  
1359 [http://www.imshealth.com/en/thought-leadership/quintilesims-institute/reports/medicines-](http://www.imshealth.com/en/thought-leadership/quintilesims-institute/reports/medicines-use-and-spending-in-the-us-a-review-of-2015-and-outlook-to-2020)  
1360 [use-and-spending-in-the-us-a-review-of-2015-and-outlook-to-2020.](http://www.imshealth.com/en/thought-leadership/quintilesims-institute/reports/medicines-use-and-spending-in-the-us-a-review-of-2015-and-outlook-to-2020))

- 1361 21. Kertesz SG. Turning the Tide or Riptide? the Changing Opioid Epidemic. Substance  
1362 abuse : official publication of the Association for Medical Education and Research in  
1363 Substance Abuse 2016:0.
- 1364 22. Hirsch A, Proescholdbell SK, Bronson W, Dasgupta N. Prescription histories and dose  
1365 strengths associated with overdose deaths. Pain medicine (Malden, Mass)  
1366 2014;15:1187-95.
- 1367 23. Wu LT, Zhu H, Swartz MS. Treatment utilization among persons with opioid use disorder  
1368 in the United States. Drug and alcohol dependence 2016;169:117-27.
- 1369 24. Dart RC, Surratt HL, Cicero TJ, et al. Trends in opioid analgesic abuse and mortality in  
1370 the United States. The New England journal of medicine 2015;372:241-8.
- 1371 25. Vaughn MG, Salas-Wright CP, Oh S. Trends in heroin access among adolescents in the  
1372 United States, 2002-2014. Prev Med 2017;99:67-8.
- 1373 26. Meiman J, Tomasallo C, Paulozzi L. Trends and characteristics of heroin overdoses in  
1374 Wisconsin, 2003-2012. Drug Alcohol Depend 2015;152:177-84.
- 1375 27. Jones CM, Logan J, Gladden RM, Bohm MK. Vital Signs: Demographic and Substance  
1376 Use Trends Among Heroin Users - United States, 2002-2013. MMWR Morb Mortal Wkly  
1377 Rep 2015;64:719-25.
- 1378 28. Lipari RN, Hughes A. Trends in Heroin Use in the United States: 2002 to 2013. The  
1379 CBHSQ Report. Rockville (MD)2013.
- 1380 29. Barrio G, Montanari L, Bravo MJ, et al. Trends of heroin use and heroin injection  
1381 epidemics in Europe: findings from the EMCDDA treatment demand indicator (TDI). J  
1382 Subst Abuse Treat 2013;45:19-30.
- 1383 30. Victor GA, Walker R, Cole J, Logan TK. Opioid analgesics and heroin: Examining drug  
1384 misuse trends among a sample of drug treatment clients in Kentucky. Int J Drug Policy  
1385 2017;46:1-6.
- 1386 31. Swanson DM, Hair LS, Strauch Rivers SR, et al. Fatalities Involving Carfentanil and  
1387 Furanyl Fentanyl: Two Case Reports. J Anal Toxicol 2017:1-5.
- 1388 32. Dwyer JB, Janssen J, Luckasevic TM, Williams KE. Report of Increasing Overdose  
1389 Deaths that include Acetyl Fentanyl in Multiple Counties of the Southwestern Region of  
1390 the Commonwealth of Pennsylvania in 2015-2016. J Forensic Sci 2017.
- 1391 33. Marshall BDL, Krieger MS, Yedinak JL, et al. Epidemiology of fentanyl-involved drug  
1392 overdose deaths: A geospatial retrospective study in Rhode Island, USA. Int J Drug  
1393 Policy 2017.
- 1394 34. Carroll JJ, Marshall BDL, Rich JD, Green TC. Exposure to fentanyl-contaminated heroin  
1395 and overdose risk among illicit opioid users in Rhode Island: A mixed methods study. Int  
1396 J Drug Policy 2017.
- 1397 35. Somerville NJ, O'Donnell J, Gladden RM, et al. Characteristics of Fentanyl Overdose -  
1398 Massachusetts, 2014-2016. MMWR Morbidity and mortality weekly report 2017;66:382-  
1399 6.
- 1400 36. Mercado MC, Sumner SA, Spelke MB, Bohm MK, Sugerman DE, Stanley C. Increase in  
1401 Drug Overdose Deaths Involving Fentanyl-Rhode Island, January 2012-March 2014.  
1402 Pain medicine (Malden, Mass) 2017.
- 1403 37. Bode AD, Singh M, Andrews J, Kapur GB, Baez AA. Fentanyl laced heroin and its  
1404 contribution to a spike in heroin overdose in Miami-Dade County. The American journal  
1405 of emergency medicine 2017.
- 1406 38. Opioid-Related Inpatient Stays and Emergency Department Visits by State, 2009–2014.  
1407 HCUP Statistical Brief #219. Agency for Healthcare Research and Quality, 2016.  
1408 (Accessed Dec 18, 2016,
- 1409 39. Administration SAaMHS. Drug Abuse Warning Network, 2011: National Estimates of  
1410 Drug-Related Emergency Department Visits. Rockville, MD: Substance Abuse and  
1411 Mental Health Services Administration; 2013.

- 1412 40. Cunningham RM, Bernstein SL, Walton M, et al. Alcohol, tobacco, and other drugs:  
1413 future directions for screening and intervention in the emergency department. *Academic*  
1414 *emergency medicine : official journal of the Society for Academic Emergency Medicine*  
1415 2009;16:1078-88.
- 1416 41. Choo EK, Ranney ML, Aggarwal N, Boudreaux ED. A systematic review of emergency  
1417 department technology-based behavioral health interventions. *Academic emergency*  
1418 *medicine : official journal of the Society for Academic Emergency Medicine* 2012;19:318-  
1419 28.
- 1420 42. Cunningham R, Mello MJ. Clearing the smoke: behavioral interventions in the  
1421 emergency department. *Academic emergency medicine : official journal of the Society*  
1422 *for Academic Emergency Medicine* 2011;18:635-6.
- 1423 43. Cherpitel CJ, Korcha RA, Moskalewicz J, Swiatkiewicz G, Ye Y, Bond J. Screening, brief  
1424 intervention, and referral to treatment (SBIRT): 12-month outcomes of a randomized  
1425 controlled clinical trial in a Polish emergency department. *Alcoholism, clinical and*  
1426 *experimental research* 2010;34:1922-8.
- 1427 44. Bernstein E, Bernstein J, Feldman J, et al. An evidence based alcohol screening, brief  
1428 intervention and referral to treatment (SBIRT) curriculum for emergency department  
1429 (ED) providers improves skills and utilization. *Subst Abus* 2007;28:79-92.
- 1430 45. Affronti M, Affronti A, Pagano S, et al. The health of irregular and illegal immigrants:  
1431 analysis of day-hospital admissions in a department of migration medicine. *Intern*  
1432 2013;8:561-6.
- 1433 46. Repper J, Carter T. A review of the literature on peer support in mental health services. *J*  
1434 *Ment Health* 2011;20:392-411.
- 1435 47. Boisvert R, Martin L, Grosek M, Clarie A. Effectiveness of a peer -support community in  
1436 addiction recovery: participation as intervention. *Occup Ther Int* 2008;15:205-20.
- 1437 48. Deering K, Kerr T, Tyndall M, et al. A peer-led mobile outreach program and increased  
1438 utilization of detoxification and residential drug treatment among female sex workers  
1439 who use drugs in a Canadian setting. *Drug Alcohol Depend* 2011;113:46-54.
- 1440 49. Treloar C, Rance J, Bath N, et al. Evaluation of two community-controlled peer support  
1441 services for assessment and treatment of hepatitis C virus infection in opioid substitution  
1442 treatment clinics: The ETHOS study, Australia. *Int J Drug Policy* 2015;26:992-8.
- 1443 50. Bassuk EL, Hanson J, Greene RN, Richard M, Laudet A. Peer-Delivered Recovery  
1444 Support Services for Addictions in the United States: A Systematic Review. *J Subst*  
1445 *Abuse Treat* 2016;63:1-9.
- 1446 51. James T, Bibi S, Langlois B, Dugan E, Mitchell P. Boston Violence Intervention  
1447 Advocacy Program: A Qualitative Study of Client Experiences and Perceived Effect.  
1448 *Acad Emerg Med* 2014;21:742-51.
- 1449 52. Gonzalez SA, Fierer DS, Talal AH. Medical and Behavioral Approaches to Engage  
1450 People Who Inject Drugs Into Care for Hepatitis C Virus Infection. *Addict Disord Their*  
1451 *Treat* 2017;16:S1-S23.
- 1452 53. Could peer-recovery coaches help fight drug addiction epidemic? at  
1453 [http://www.cnn.com/2016/10/24/health/peer-recovery-coaches-drug-addition-](http://www.cnn.com/2016/10/24/health/peer-recovery-coaches-drug-addition-epidemic/index.html)  
1454 [epidemic/index.html](http://www.cnn.com/2016/10/24/health/peer-recovery-coaches-drug-addition-epidemic/index.html).)
- 1455 54. Samuels EA. Emergency department naloxone distribution: A Rhode Island Department  
1456 of Health, recovery community, and emergency department partnership to reduce opioid  
1457 overdose deaths. *RI Med J* 2014;91:38-9.
- 1458 55. Vestal C. Recovery coaches at ERs try to help opioid addicts avoid another overdose.  
1459 *The Washington Post* 2017 July 22.
- 1460 56. Rhode Island's Strategic Plan on Addiction and Overdose: Four Strategies to Alter the  
1461 Course of an Epidemic. Rhode Island Governor's Overdose Prevention and Intervention  
1462 Task Force, 2015. (Accessed Oct 12, 2016, at

- 1463 <http://www.health.ri.gov/news/temp/RhodeIslandsStrategicPlanOnAddictionAndOverdose.pdf>)
- 1464
- 1465 57. Jiang Y, McDonald JV, Koziol J, McCormick M, Viner-Brown S, Alexander-Scott N. Can
- 1466 Emergency Department, Hospital Discharge, and Death Data Be Used to Monitor
- 1467 Burden of Drug Overdose in Rhode Island? *J Public Health Manag Pract* 2017;23:499-
- 1468 506.
- 1469 58. Darke S, Mills K, Ross J, Teesson M. Rates and correlates of mortality amongst heroin
- 1470 users: findings from the Australian Treatment Outcome Study (ATOS), 2001-2009. *Drug*
- 1471 *Alcohol Depend* 2011;115:190-5.
- 1472 59. Prochaska J, Redding C, Evers K. The Transtheoretical Model and Stages of Change.
- 1473 In: K. Glanz BKRFML, ed. *Health Behavior and Health Education: Theory, Research,*
- 1474 *and Practice*. 3rd ed. San Francisco, CA2002.
- 1475 60. Miller WR, & Rollnick, S. , 3rd ed. Guilford Press, 2012. *Motivational Interviewing*. 3rd
- 1476 ed. New York, NY: Guilford Publications; 2012.
- 1477 61. Smedslund G, Berg RC, Hammerstrom KT, et al. Motivational interviewing for substance
- 1478 abuse. *Cochrane Database Syst Rev* 2011:CD008063.
- 1479 62. Dunn C, Deroo L, Rivara FP. The use of brief interventions adapted from motivational
- 1480 interviewing across behavioral domains: a systematic review. *Addiction* 2001;96:1725-
- 1481 42.
- 1482 63. Prochaska J, DiClemente C, Norcross J. In search of how people change: Applications
- 1483 to the addictive behaviors. *American Psychologist* 1992;47:1102-14.
- 1484 64. Ball SA, Legow NE. Attachment theory as a working model for the therapist transitioning
- 1485 from early to later recovery substance abuse treatment. *Am J Drug Alcohol Abuse*
- 1486 1996;22:533-47.
- 1487 65. Germain CB, Gitterman A. *The life model of social work practice: Advances in theory &*
- 1488 *practice*: Columbia University Press; 1996.
- 1489 66. Gorey KM, Thyer BA, Pawluck DE. Differential effectiveness of prevalent social work
- 1490 practice models: A meta-analysis. *Social Work* 1998;43:269-78.
- 1491 67. Videka-Sherman L. Metaanalysis of research on social work practice in mental health.
- 1492 *Social Work* 1988;33:325-38.
- 1493 68. Payne M. *Modern social work theory*: Oxford University Press; 2015.
- 1494 69. Reid WJ. Research on task-centered practice. *Social Work Research* 1997;21:132-7.
- 1495 70. Hofmann SG, Asnaani A, Vonk IJ, Sawyer AT, Fang A. The Efficacy of Cognitive
- 1496 Behavioral Therapy: A Review of Meta-analyses. *Cognit Ther Res* 2012;36:427-40.
- 1497 71. Moore M, Cristofalo M, Dotolo D, et al. When high pressure, system constraints, and a
- 1498 social justice mission collide: A socio-structural analysis of emergency department social
- 1499 work services. *Soc Sci Med* 2017;178:104-14.
- 1500 72. Marshall BDL, Yedinak JL, Goyer J, Green TC, Koziol JA, Alexander-Scott N.
- 1501 Development of a Statewide, Publicly Accessible Drug Overdose Surveillance and
- 1502 Information System. *American journal of public health* 2017;107:1760-3.
- 1503 73. Prescription Drug Overdose Data & Statistics: Guide to ICD-9-CM and ICD-10 Codes
- 1504 Related to Poisoning and Pain. Centers for Disease Control and Prevention, 2013.
- 1505 (Accessed Jul 27, 2017, at [https://www.cdc.gov/drugoverdose/pdf/pdo\\_guide\\_to\\_icd-9-](https://www.cdc.gov/drugoverdose/pdf/pdo_guide_to_icd-9-cm_and_icd-10_codes-a.pdf)
- 1506 [cm\\_and\\_icd-10\\_codes-a.pdf](https://www.cdc.gov/drugoverdose/pdf/pdo_guide_to_icd-9-cm_and_icd-10_codes-a.pdf).)
- 1507 74. McCormick M, Koziol J, Sanchez K. Development and Use of a New Opioid Overdose
- 1508 Surveillance System, 2016. *R I Med J* (2013) 2017;100:37-9.
- 1509 75. van Buuren S. Multiple imputation of discrete and continuous data by fully conditional
- 1510 specification. *Stat Methods Med Res* 2007;16:219-42.
- 1511 76. White IR, Royston P, Wood AM. Multiple imputation using chained equations: Issues
- 1512 and guidance for practice. *Stat Med* 2011;30:377-99.

- 1513 77. Harel O. Inferences on missing information under multiple imputation and two-stage  
1514 multiple imputation. *Statistical Methodology* 2007;4:75-89.
- 1515 78. Lin DY. Proportional means regression for censored medical costs. *Biometrics*  
1516 2000;56:775-8.
- 1517 79. Lin DY, Wei LJ, Yang I, Ying Z. Semiparametric regression for the mean and rate  
1518 functions of recurrent events. *J Roy Stat Soc B* 2000;62:711-30.
- 1519 80. Merchant RC, Baird JR, Liu T. Short-term Efficacy of a Brief Intervention to Reduce Drug  
1520 Misuse and Increase Drug Treatment Utilization Among Adult Emergency Department  
1521 Patients. *Academic emergency medicine : official journal of the Society for Academic*  
1522 *Emergency Medicine* 2015;22:1172-80.
- 1523 81. Banta-Green CJ, Coffin PO, Merrill JO, et al. Impacts of an opioid overdose prevention  
1524 intervention delivered subsequent to acute care. *Injury prevention : journal of the*  
1525 *International Society for Child and Adolescent Injury Prevention* 2018.
- 1526 82. Jiang Y, McDonald JV, Wilson ME, et al. Rhode Island Unintentional Drug Overdose  
1527 Death Trends and Ranking - Office of the State Medical Examiners Database. *Rhode*  
1528 *Island medical journal* 2018;101:33-6.
- 1529
- 1530



## **I. Study Design**

The purpose of this study is to determine the effectiveness of peer navigation versus a standard behavioral intervention delivered in the emergency department (ED) to overdose patients and those at risk of recurrent opioid overdose. A total of 650 ED patients will be recruited from two emergency departments in a single health care system in Providence, Rhode Island into a two-arm randomized trial with 18 months of follow-up post-randomization. Eligible participants will be randomly assigned (1:1) in the ED to receive a behavioral intervention from a certified peer recovery support specialist or a licensed clinical social worker (LCSW). Effectiveness will be measured objectively through linkage to administrative statewide databases, with two primary endpoints: (1) engagement in formal addiction treatment (e.g., inpatient services, outpatient services, medication-assisted treatment [MAT]) from a licensed substance abuse treatment provider within 30 days following the index ED visit; and (2), recurrent ED visit for an opioid overdose within 18-months following the index ED visit. Exploratory outcomes of interest are: overdose fatality, repeat ED visits related to opioids, and successful completion of an addiction treatment program and/or long-term retention in MAT.

## **II. Research Questions**

This study addresses the following research questions:

1. Does peer navigation result in greater early treatment engagement and reduction in recurrent opioid overdose compared to a standard intervention delivered by a clinical social worker among persons presenting to the ED for on opioid overdose or are being treated for a visit related to illicit opioid use?
2. If peer navigation is found to be more effective than standard of care, is there heterogeneity of treatment effect related to key patient characteristics (e.g., sex, race, type of opioid used, and history of comorbid chronic pain, depression or posttraumatic stress disorder)?

## **III. Study Sample**

A total of 650 patients treated for an opioid overdose or at risk for an opioid overdose (defined below) will be recruited (n=325 per arm) from two emergency departments in a single health care system in Providence, Rhode Island and followed prospectively using administrative datasets. Our primary outcomes will be: (1) engagement in treatment within 30-days after the ED visit, and (2) recurrent ED visit for opioid overdose over the 18-month follow-up period.

We will recruit adult ED patients who are: (1) being treated for an opioid overdose, or (2) have had an opioid overdose in the past 12 months (identified by self-report during screening or in review of the EMR); or (3) are presenting with a visit related to illicit injection opioid use (e.g., cutaneous injection-related infection, opioid withdrawal, endocarditis). We are specifically

46 targeting patients with a current or recent opioid overdose and those who inject opioids illicitly,  
47 as they are at highest risk for opioid overdose and death.

48

49 All participants will be recruited from two EDs—Level 1 and Level 2 trauma centers—  
50 located in the state’s capital of Providence. Together, these two EDs receive over 175,000 adult  
51 visits each year. Between 2017 and 2018, the two EDs reported a total of 1,446 visits for  
52 suspected opioid overdoses, representing 45% of all ED visits for suspected opioid overdoses  
53 reported to the Rhode Island Department of Health ( $n = 3,239$ ).

54

55 A consecutive sample of ED patients will be assessed for eligibility by one of eleven full-  
56 time research assistants employed in the two EDs who can recruit participants 24 hours per day,  
57 seven days a week. Potential participants will be identified by the research assistants by  
58 screening electronic medical records (EMR) or by referrals from treating providers in the ED.  
59 Patients who meet the initial eligibility screen will undergo a further in-person assessment by a  
60 study RA.

61

62 Participants will be eligible if they are: (1) English-speaking, (2) 18 years of age or older, and  
63 (3) are being treated for an opioid overdose *or* identified as having had an opioid overdose in the  
64 past 12 months *or* are being treated for a visit related to illicit opioid use (e.g., abscess, opioid  
65 withdrawal), (4) and are able to provide informed consent. Participants are ineligible if they are  
66 critically ill or injured, are previously enrolled in the trial, in police custody or incarcerated,  
67 pregnant, or live outside Rhode Island (patients must live in state to link to administrative  
68 databases). Patients who are critically ill will be eligible once cleared by their physician.

69

70 After screening, if the patient is eligible and willing to participate, then full written informed  
71 consent will be obtained. After obtaining consent, participants will be randomly assigned 1:1  
72 within each study site to receive either a behavioral intervention delivered by a certified peer  
73 recovery support specialist or by an LCSW. Allocations will be randomly assigned using the  
74 REDCap randomization feature. The randomization schedule will be maintained by a data  
75 manager not involved with participant recruitment or the final study analyses. We anticipate the  
76 intervention will begin within 30 minutes of randomization.

77

78 Participants and providers cannot be blinded to their intervention assignment, however  
79 investigators and analysts performing the study analyses will be blinded to arm allocation.

80

81 Throughout the study, participants will remain assigned to the treatment arm to which they  
82 were assigned for the purposes of intention-to-treat (ITT) analyses. Following randomization, we  
83 will take additional steps to minimize crossover in order to maximize internal validity, and also  
84 mimic what would happen if emergency departments only had clinical social workers or only  
85 had peer navigators, respectively. Practically speaking, this means that if a participant who is  
86 randomized to receive an intervention has a repeat ED visit in which a social worker or a peer  
87 navigator would be called, they will be assigned to receive the same intervention on the repeat  
88 visit. This is ethically sound as it is consistent with current standard of care. This is feasible for  
89 several reasons. First, our electronic medical record (EMR) system allows us to create “flags” for  
90 participants enrolled in research studies. This would generate an on-screen notification to the  
91 treating providers and also alert the study team via a text notification. Second, our research

92 assistants are available 24 hours a day, seven days a week to actively assess for repeat visits  
93 among study participants during the course of regular patient screening, and will intervene if  
94 necessary to ensure a participant receives the same intervention as that which they were assigned  
95 at randomization, Third, our hospital system cares for almost 75% of the overdoses in the state,  
96 meaning that these notifications will have a broad catchment area. Moreover, a review of data  
97 from the state and hospital systems shows that patients tend to return to the same ED when they  
98 have a repeat visit. Finally, since the primary outcome of repeat ED visit for overdose requires an  
99 ED visit, the outcome will occur before a subsequent intervention (and potential cross-  
100 contamination) in most cases. Currently it is only standard of care for patients to receive a  
101 behavioral intervention after an overdose, but not necessarily other opioid-related visits. We will  
102 measure any protocol deviations through our robust data sources and hospital-based tracking  
103 systems (see below).

104

105

#### 106 **IV. Data Sources**

107

108 This RCT will have two primary endpoints: (1) engagement in a formal addiction treatment  
109 program from a licensed substance abuse treatment provider within 30 days following the index  
110 ED visit; and (2), recurrent ED visit for an opioid overdose within 18 months from the index ED  
111 visit. We will obtain objective assessments of these outcomes through the use of statewide  
112 administrative database as outlined below:

113

114 30-day treatment engagement (primary endpoint 1): The first primary outcome, engagement  
115 in addiction treatment, will be defined as the proportion who are admitted to a formal addiction  
116 treatment program within thirty days following the initial ED visit. This outcome was chosen  
117 because a key short-term goal of the ED behavioral intervention is to promote early treatment  
118 engagement. This outcome will be assessed using Rhode Island Department of Behavioral  
119 Health, Developmental Disabilities, and Hospitals (BHDDH) and Prescription Drug Monitoring  
120 Program (PDMP) records. The BHDDH database contains information on all admissions to  
121 publicly funded substance abuse treatment programs in the state. We will define treatment  
122 engagement as admission to any of the program types licensed by BHDDH, including inpatient  
123 detoxification, day treatment programs, residential treatment, intensive outpatient services, and  
124 opioid treatment programs (i.e., methadone). Second, we will query the participant's RI PDMP  
125 records in order to identify enrollment in office-based buprenorphine therapy. The RI PDMP  
126 manages a database that contains information on all prescriptions for schedule II-IV substances  
127 filled in the state. The database is updated daily; all pharmacies are required to report  
128 prescriptions within 48-hours of the fill date. The database includes information on the patient  
129 (e.g., name, sex, birth date, address including zip code), the prescription filled (e.g., quantity,  
130 days supply, national drug code number), and prescriber/pharmacy data. Pharmacies are required  
131 by law to report prescriptions to the PDMP regardless of payment type. All records will be  
132 linked deterministically to participant data using identifiable information (e.g., name, social  
133 security number) within the Stronghold computing environment, a HIPAA-compliant server  
134 maintained by Dr. Marshall's team at Brown University. Our research team has experience  
135 extracting and analyzing PMDP and BHDDH data for statewide surveillance purposes.

136

137 Recurrent ED visits for overdose (primary endpoint 2): The second primary outcome,  
138 recurrent ED visit for overdose, will be defined as the proportion of participants who are treated  
139 in any Rhode Island ED for an opioid overdose at any time during the 18-month follow-up  
140 period following the initial ED visit. Recurrent ED visits for opioid overdose were chosen as the  
141 second primary outcome as a long-term goal of the ED behavioral interventions is to reduce fatal  
142 and non-fatal overdose. Two data sources will be used to assess this outcome. First, we will  
143 access the electronic medical records (EMRs) of the 12 EDs in Rhode Island through the Rhode  
144 Island Quality Institute Statewide Health Information Exchange. This data source will be made  
145 accessible through Brown's Advance- CTR Unified Research Data Sharing Access (URSA)  
146 infrastructure. This unified data system provides access to EMR data from all major health  
147 systems in Rhode Island. Thus, we will capture repeat visits for an opioid overdose that occur in  
148 all 12 EDs in Rhode Island. We will define an ED visit for an opioid overdose based on CDC  
149 guidelines for all opioid poisonings (which includes illicit opioids) and utilizes International  
150 Classification of Disease (ICD) coding. Second, we will query the RI Department of Health  
151 (RIDOH) Opioid 48-Hour Overdose Surveillance System. The RIDOH mandates all suspected  
152 opioid overdose cases presenting to an RI hospital be reported to the department within 48 hours.  
153 This data source will capture recurrent overdoses not identified by ICD codes in the unified  
154 EMR data system, and also contains additional fields of interest (e.g., pre-existing risk factors for  
155 overdose).

156

157 Finally, we will determine mortality outcomes by requesting data from the National Death  
158 Index (NDI), which is a centralized database of death record information on file in state vital  
159 statistics offices. We will use the NDI data in conjunction with the Rhode Island Department of  
160 Health medical examiner data to determine whether or not a participant in the study has died  
161 during follow-up, and if so, the cause of death (including overdose).

162

163

## 164 **V. Methods**

165

166 For the two primary outcomes (engagement in formal SUD treatment within 30 days of the  
167 initial ED visit and occurrence of a subsequent ED visit for opioid overdose within 18 months of  
168 the initial ED visit), we will use separate logistic regression models with indicators for treatment  
169 allocation and study site, as well as term representing the interaction of treatment allocation with  
170 study site. Second, we will conduct subgroup analyses to understand potential heterogeneity of  
171 treatment effects by age and gender.

172

173 For all analyses, routine procedures will first be conducted to ensure data accuracy/adequacy.  
174 We will use an intention-to-treat (ITT) approach in all analyses to address potential problems  
175 inherent in following only intervention completers; a sensitivity analysis ("per protocol") will be  
176 conducted among only those that complete the ED intervention. Given use of administrative data  
177 sources we anticipate minimal missingness in our final dataset. However, missing outcome and  
178 covariate data will be handled using case-wise deletion. Additionally, we will perform a  
179 sensitivity analysis to determine the potential impact of missing data on treatment effect. This  
180 sensitivity analysis will use multiple imputation performed using chained equations that specify  
181 the conditional models for all of the variables with missing values.

182

183 Effectiveness, 30-day engagement in treatment (primary endpoint 1): We will compare the  
184 effectiveness of the peer navigation versus social work intervention on increasing engagement in  
185 formal addiction treatment within 30 days of the initial ED visit. As the primary analysis, we will  
186 compare the proportion who are admitted to a licensed addiction treatment program (using chi-  
187 square analysis) between the two groups. In the next stage of our primary analysis, logistic  
188 regression models will be used to determine the independent effect of the intervention arm on  
189 30-day treatment admission, adjusting for study site and an interaction term between treatment  
190 allocation and study site, as described above.

191

192 Effectiveness, recurrent ED visit for an opioid overdose (primary endpoint 2): We will  
193 compare the effectiveness of the peer navigation versus the social work intervention on  
194 preventing subsequent ED visits for opioid overdose. As the primary analysis, we will compare  
195 the overall proportion of patients experiencing a subsequent opioid overdose over the 18-month  
196 follow-up period between the intervention groups (using chi- square analysis). In the next stage  
197 of our primary analysis, logistic regression models will be used to determine the independent  
198 effect of the intervention arm on recurrent ED visits for opioid overdoses, adjusting for study  
199 site, as described for primary endpoint 1.

200

201 In a sensitivity analysis, we will assess imbalance in key prognostic factors for the study  
202 outcomes (e.g., lifetime history of overdose, lifetime treatment engagement, age, sex, race, and  
203 housing status) between the two study arms. If imbalance is observed, we will include these  
204 covariates in the logistic regression models to determine the robustness of the primary analysis  
205 results.

206

207 In exploratory analyses, we will also examine a number of other outcomes, including:  
208 overdose *rates*, overdose death, and successful completion of or retention in addiction treatment.  
209 Successful completion of and/or retention in addiction treatment will be defined based on  
210 discharge data collected in BHOLD and prescription refill data in the PDMP (e.g., on MAT for  
211  $\geq 6$  months). We will examine the time to ED visit for an opioid overdose using a Kaplan-Meier  
212 analysis. Patients will be censored at the end of the 18-month follow-up period, considered the  
213 last point of contact. We will use Breslow's method to test if the time to subsequent opioid  
214 overdose rates differs between the groups. Next, Cox proportional hazards modeling will be used  
215 to estimate hazard ratios (HRs) and corresponding 95% confidence intervals (CIs) for occurrence  
216 of repeat overdose between groups. HRs will be adjusted for clinical and demographic  
217 characteristics believed to predict the outcome of opioid overdose in order to adjust for possible  
218 residual confounding and treatment-factor interactions. Finally, since participants may  
219 experience multiple opioid overdoses during follow-up, we will also conduct recurrent-event  
220 survival analyses. These models extend the Cox model approach and allow for estimation of  
221 hazard ratios pooled across repeated periods at risk. Finally, we will examine if heterogeneity of  
222 intervention effect is modified by age, sex, race, pre-existing chronic pain, past treatment history,  
223 and reason for presentation to the ED. We will perform stratified subgroup analyses to determine  
224 if treatment effects vary between groups of individuals.

225

226 Feasibility and Sample Size Calculation. First, we assume that ~2,000 patients will be treated  
227 at the two EDs for an opioid overdose over the 24-month recruitment period; this is based on  
228 data from the RI Opioid Overdose Surveillance System and is a conservative estimate that does

229 not include other eligibility criteria (e.g., recent overdose). Next, we assume that 65% (n=1,300)  
230 of these patients will be willing to be screened (prior studies of behavioral interventions for drug  
231 use at the two EDs have had screening rates > 80%) (Merchant, Baird, & Liu, 2015). Third, we  
232 assume that ~50% (n=650) of these patients will be eligible and randomized to an intervention  
233 arm (n=325 per arm). Thus, we estimate that 24 months will be required to recruit 650  
234 participants. Given our use of objective outcome data from administrative datasets, we do not  
235 expect dropout to significantly impact our statistical power, but our power calculations  
236 conservatively reflect a 10% loss to follow-up rate.

237

238 For our sample size calculation, we assumed that 7% of participants in the social work arm  
239 will enroll in a formal treatment program within 30 days of ED discharge (based on preliminary  
240 data from the state and RIH). Given this, we have >80% power to detect a two-fold increase (i.e.,  
241 >7 percentage point absolute increase) in the rate of 30-day treatment engagement between the  
242 two arms (Figure 2A); this increase has been deemed a bench-mark by key state stakeholders.  
243 For primary endpoint 2 (recurrent ED visit for an opioid overdose), we assumed that 15% of  
244 patients in the social work arm will have a recurrent ED visit for an opioid overdose within 18-  
245 months of their first visit. This estimate is based on a chart review of 374 patients after program  
246 implementation of the RIH ED behavioral intervention program and in recently published data  
247 by Banta-Green et al.(Banta-Green et al., 2018) The latter study from Washington State found  
248 around a 20% incidence of overdose within 18-months following of an initial ED visit. Our  
249 assumption of a 15% incidence of repeat ED visit for overdose is conservative compared to this  
250 finding, particularly in light of the fact the Rhode Island has nearly twice as many overdose  
251 deaths per capita than Washington State.(Jiang et al., 2018) We will have >80% power to detect  
252 a 50% relative reduction (7.5 percentage point absolute reduction) in the risk of recurrent  
253 overdose within 18 months of their ED visit (Figure 2B), this reduction was felt to be clinically  
254 relevant and commensurate with statewide goals in reducing overdose via various strategies.

255

256 We chose to evaluate the outcome date within the first 18 months after the initial ED visit for  
257 two main reasons. First, the risk of recurrent overdose appears to level-off by about 18 months,  
258 meaning that most individuals who will experience another overdose will do so within the first  
259 18 months. Second, given the urgent need to have an evidence-based evaluation of peer-led  
260 behavioral interventions for OUDs, a shorter length of follow-up would allow us to disseminate  
261 our study findings sooner. However, we recognize that there is potential value in having a longer  
262 follow-up period both from an impact standpoint and also in terms of statistical power to detect a  
263 difference between the treatment groups. Therefore, as a contingency plan, we could extend the  
264 length of follow-up by one year (30 months total) based on 18-month outcome analyses. We will  
265 make this decision in conjunction with the LJA Foundation.

266

267

## 268 **VI. Correspondence with Ethical Standards for Research**

269

270 The research protocol has been reviewed and approved by the Lifespan Institutional Review  
271 Boards (IRBs) at Rhode Island Hospital (IRB 1 registration: 00000396, IRB 2 registration:  
272 00004624) and The Miriam Hospital (IRB registration 00000482), with approval number  
273 212418.

274

Analysis Plan for the Navigator Trial

08/07/2020

275

276 Banta-Green, C. J., Coffin, P. O., Merrill, J. O., Sears, J. M., Dunn, C., Floyd, A. S., . . . Donovan, D. M.  
277 (2018). Impacts of an opioid overdose prevention intervention delivered subsequent to acute care.  
278 *Inj Prev*. doi:10.1136/injuryprev-2017-042676

279 Jiang, Y., McDonald, J. V., Wilson, M. E., Koziol, J., Goldschmidt, A., King, E., . . . Alexander-Scott, N.  
280 (2018). Rhode Island Unintentional Drug Overdose Death Trends and Ranking - Office of the  
281 State Medical Examiners Database. *RI Med J* (2013), 101(1), 33-36.

282 Merchant, R. C., Baird, J. R., & Liu, T. (2015). Short-term Efficacy of a Brief Intervention to Reduce  
283 Drug Misuse and Increase Drug Treatment Utilization Among Adult Emergency Department  
284 Patients. *Acad Emerg Med*, 22(10), 1172-1180. doi:10.1111/acem.12767

285
